# Supplementary material
Source: publisher site journal article supplement (https://www.spandidos-publications.com/8083/downloadSupplementary)
Supplement: Supplementary file 1 [file downloadSupplementary]

## Sheet: 附表10
Table SV. This table provides the results of the differentially expressed gene analysis between subgroups of disulfidptosis-related genes.
Tag	logFC	AveExpr	t	P-value	adj.P.Val	B
CNN2	0.777886	7.2643	8.1989	4.92151e-12	1.2382e-07	16.9171
MYH9	0.488525	7.2984	7.87568	2.03101e-11	2.55491e-07	15.5865
ACTN1	0.582309	6.93757	7.74894	3.53753e-11	2.78403e-07	15.0653
COL5A1	0.497548	5.29527	7.6977	4.4263e-11	2.78403e-07	14.8547
PDLIM7	0.393632	5.83401	7.46028	1.24812e-10	5.23355e-07	13.8803
FLNA	0.715907	7.12649	7.38281	1.74909e-10	6.23839e-07	13.5629
LOXL2	0.498521	4.8515	7.32869	2.21357e-10	6.23839e-07	13.3415
MCCC1	-0.765676	5.37984	-7.32682	2.23163e-10	6.23839e-07	13.3338
MCCC1-AS1	-0.585708	8.05929	-6.95599	1.11271e-09	2.33289e-06	11.8224
TGFB1I1	0.574248	5.55902	6.8747	1.57944e-09	3.0567e-06	11.4929
MMP14	0.748808	7.51706	6.81951	2.00261e-09	3.57351e-06	11.2695
ADAMTS12	0.755183	4.34066	6.79007	2.27259e-09	3.57351e-06	11.1505
MRC2	0.397302	5.0507	6.75594	2.63116e-09	3.79547e-06	11.0126
SLC9A1	0.353915	5.20223	6.74605	2.7452e-09	3.79547e-06	10.9727
RAB23	0.711224	4.97002	6.71668	3.11349e-09	3.79547e-06	10.8543
CDH11	1.08396	6.31801	6.71029	3.19991e-09	3.79547e-06	10.8285
MFGE8	0.616703	5.20361	6.70216	3.31332e-09	3.79547e-06	10.7957
SLC25A16	-0.581571	5.87613	-6.70176	3.3189e-09	3.79547e-06	10.7941
THBS2	1.00814	6.72145	6.68393	3.58227e-09	3.91853e-06	10.7223
BICD1	0.595233	4.57087	6.66707	3.85023e-09	4.03616e-06	10.6544
GLT25D1	0.436276	6.33952	6.64195	4.2867e-09	4.1926e-06	10.5534
PLAU	0.892893	4.75728	6.63062	4.49939e-09	4.1926e-06	10.5078
MIR671	0.374861	5.19631	6.58922	5.3694e-09	4.8246e-06	10.3415
COL3A1	1.15672	7.52982	6.47816	8.61625e-09	7.22587e-06	9.89648
ECE1	0.41189	6.31064	6.46565	9.0865e-09	7.37443e-06	9.84648
ITGA3	1.09577	6.30341	6.39612	1.22038e-08	9.59482e-06	9.56898
FUT11	0.413477	4.76939	6.36063	1.41822e-08	1.08125e-05	9.42763
PHYH	-0.510225	5.81839	-6.32702	1.63471e-08	1.17508e-05	9.29399
PAM	0.716166	4.94714	6.30333	1.80669e-08	1.26263e-05	9.19989
SDF4	0.26222	5.50187	6.29095	1.90356e-08	1.29437e-05	9.15076
TMEM184B	0.26089	5.92026	6.24531	2.30724e-08	1.52758e-05	8.96985
HSPG2	0.415458	6.37447	6.23578	2.40167e-08	1.54932e-05	8.93213
ACTB	0.236057	8.86268	6.21087	2.66696e-08	1.63654e-05	8.83358
SEMA7A	0.483252	4.53324	6.17104	3.15255e-08	1.88845e-05	8.67626
LOX	1.03066	4.56947	6.15775	3.33323e-08	1.95025e-05	8.62385
CSRP1	0.427365	6.02243	6.14776	3.47581e-08	1.98745e-05	8.58446
ITGA11	0.973627	5.33299	6.13749	3.62878e-08	2.02881e-05	8.54396
TGFB1	0.692871	6.08719	6.11655	3.96118e-08	2.10743e-05	8.46154
WFDC1	0.373269	4.73072	6.11648	3.96241e-08	2.10743e-05	8.46125
SHISA5	0.248052	6.18407	6.11205	4.03664e-08	2.10743e-05	8.44379
FXYD5	0.606908	6.9214	6.10806	4.10446e-08	2.10743e-05	8.42813
INHBA	1.2175	6.66196	6.09679	4.3026e-08	2.16498e-05	8.38379
NOX4	0.616292	3.71934	6.08726	4.47747e-08	2.18661e-05	8.34633
COL8A1	0.961561	4.75822	6.08503	4.51941e-08	2.18661e-05	8.33757
FRMD6	0.834708	5.50933	6.0736	4.74048e-08	2.19196e-05	8.29266
ACTG2	0.702189	3.98073	6.06578	4.89787e-08	2.19196e-05	8.26195
TNC	1.37444	5.7052	6.06464	4.92114e-08	2.19196e-05	8.25749
RNU6-80	-0.459932	5.44178	-6.06429	4.92841e-08	2.19196e-05	8.25611
PDLIM4	0.329331	4.67665	6.06231	4.96937e-08	2.19196e-05	8.24833
IQGAP1	0.619604	8.07704	6.05693	5.08214e-08	2.19196e-05	8.22723
SSC5D	0.215442	5.19128	6.0542	5.14034e-08	2.19196e-05	8.21652
HRSP12	-0.952438	6.30609	-6.01208	6.12688e-08	2.54264e-05	8.05146
ZYX	0.260445	6.16832	6.00319	6.35798e-08	2.54264e-05	8.01666
MXRA8	0.54491	6.15838	6.00285	6.36696e-08	2.54264e-05	8.01533
LEAP2	-1.37969	5.4229	-5.97966	7.01186e-08	2.66542e-05	7.92463
ALDH5A1	-0.4089	4.62241	-5.97756	7.07331e-08	2.66542e-05	7.91643
GNB1	0.30276	7.58423	5.97727	7.0817e-08	2.66542e-05	7.91532
ATP10A	0.457753	4.17861	5.97671	7.09817e-08	2.66542e-05	7.91313
CMTM3	0.418083	5.98295	5.97183	7.24374e-08	2.68008e-05	7.89405
EPB41L5	-0.608605	5.64587	-5.96645	7.40747e-08	2.70093e-05	7.87304
MAP7D1	0.209873	5.86705	5.95085	7.9032e-08	2.84052e-05	7.81215
MMP11	0.616242	5.44157	5.93141	8.56708e-08	2.9936e-05	7.73634
FHL2	0.565102	5.44257	5.91904	9.01788e-08	3.10796e-05	7.68814
GLI2	0.2729	4.38335	5.89821	9.83044e-08	3.34222e-05	7.60706
CD248	1.14289	6.84002	5.88018	1.0592e-07	3.55311e-05	7.53694
TWIST1	0.436383	3.8857	5.8697	1.10607e-07	3.66152e-05	7.49625
DCBLD1	0.631249	5.12881	5.86415	1.13174e-07	3.69357e-05	7.47469
POSTN	1.3898	6.60186	5.86131	1.14511e-07	3.69357e-05	7.46365
TTYH3	0.279617	6.22334	5.85054	1.19718e-07	3.81264e-05	7.42187
SLC16A3	0.380142	5.60444	5.83466	1.27828e-07	3.93287e-05	7.36028
PTRF	0.425438	6.06703	5.83403	1.28157e-07	3.93287e-05	7.35787
AXL	0.571444	5.78943	5.83399	1.28183e-07	3.93287e-05	7.35768
CLU	-0.853398	7.19313	-5.82229	1.34515e-07	4.0567e-05	7.31237
FAM26E	0.670921	3.4514	5.82062	1.35444e-07	4.0567e-05	7.30591
GPR124	0.39587	5.40363	5.81698	1.37492e-07	4.06959e-05	7.29181
TPM1	0.552483	7.86226	5.75787	1.75341e-07	5.08982e-05	7.06337
PLEC	0.382789	5.52393	5.75695	1.76006e-07	5.08982e-05	7.05982
DSE	0.379549	4.34192	5.74703	1.83322e-07	5.24112e-05	7.02157
PMEPA1	0.686996	6.62534	5.74407	1.85562e-07	5.24557e-05	7.01016
CORO1C	0.346886	6.60785	5.73414	1.9328e-07	5.30032e-05	6.97189
PHC2	0.250324	6.0225	5.73409	1.93322e-07	5.30032e-05	6.97168
LBH	0.604378	6.32421	5.73346	1.93819e-07	5.30032e-05	6.96927
CSNK1G2	0.255439	5.7326	5.73021	1.96423e-07	5.31378e-05	6.95673
GJB3	0.580841	4.21409	5.71549	2.08635e-07	5.45573e-05	6.90009
PLAUR	1.04205	6.36034	5.71264	2.11084e-07	5.45573e-05	6.88913
COL4A2	0.462013	5.88705	5.71223	2.11443e-07	5.45573e-05	6.88753
P4HA2	0.400024	4.98539	5.71053	2.12919e-07	5.45573e-05	6.881
FN1	0.824346	9.17272	5.70852	2.14681e-07	5.45573e-05	6.87326
MXRA5	1.02247	5.84839	5.69461	2.27256e-07	5.60125e-05	6.8198
FOXL1	0.561336	4.80023	5.69451	2.2735e-07	5.60125e-05	6.81941
DNAJC19	-0.446489	5.83035	-5.69241	2.29313e-07	5.60125e-05	6.81134
WDR1	0.233627	6.36605	5.67607	2.45154e-07	5.87413e-05	6.74862
PLOD1	0.465532	5.99046	5.67038	2.50924e-07	5.95567e-05	6.72677
MDM4	-0.403075	5.51522	-5.66275	2.58868e-07	6.08678e-05	6.69751
PTGS1	0.528419	4.85894	5.65009	2.72595e-07	6.35021e-05	6.649
GNAI2	0.279669	6.18545	5.64433	2.79076e-07	6.44154e-05	6.62694
VGLL3	0.94832	4.89109	5.62978	2.96137e-07	6.71268e-05	6.57123
PDGFB	0.274256	4.3904	5.62976	2.96159e-07	6.71268e-05	6.57116
BRP44L	-0.565645	6.05422	-5.59507	3.41072e-07	7.60528e-05	6.43862
HTRA3	0.829705	5.09108	5.59346	3.43321e-07	7.60528e-05	6.43245
VCAN	1.12561	7.64538	5.59243	3.44759e-07	7.60528e-05	6.42852
HK1	0.410377	5.07508	5.59039	3.47632e-07	7.60528e-05	6.42074
B3GALT6	0.365259	4.52032	5.57815	3.65362e-07	7.82176e-05	6.37405
ADAM9	0.695415	7.03178	5.5776	3.66177e-07	7.82176e-05	6.37196
PALLD	0.504084	5.26452	5.57714	3.66854e-07	7.82176e-05	6.37022
ITPRIPL2	0.230017	6.31648	5.57434	3.71054e-07	7.84483e-05	6.35954
SEPN1	0.302274	6.63301	5.56795	3.80811e-07	7.98401e-05	6.33518
MYADM	0.412948	8.02845	5.55839	3.95867e-07	8.23109e-05	6.29879
NTM	0.499243	4.47464	5.55052	4.08712e-07	8.42851e-05	6.26882
PCCA-AS1	-0.663696	4.42861	-5.54659	4.1527e-07	8.44844e-05	6.25388
CST2	1.07821	5.50487	5.54592	4.16394e-07	8.44844e-05	6.25135
AGRN	0.323536	5.99133	5.53701	4.31718e-07	8.65939e-05	6.21744
ADAMTS2	0.483479	5.49987	5.53589	4.33675e-07	8.65939e-05	6.21319
FRMD5	0.458096	3.70259	5.52232	4.58171e-07	9.07647e-05	6.16163
NT5DC2	0.310727	5.40783	5.51683	4.68462e-07	9.20785e-05	6.14079
CD276	0.302374	6.30324	5.51358	4.74664e-07	9.24957e-05	6.12845
ACADSB	-0.932467	5.71628	-5.51188	4.77938e-07	9.24957e-05	6.122
AMIGO2	0.882085	4.26647	5.49973	5.01998e-07	9.53637e-05	6.07592
NRP2	0.58258	4.99712	5.4991	5.03279e-07	9.53637e-05	6.07353
2024-03-02	-0.66311	5.44577	-5.49868	5.04129e-07	9.53637e-05	6.07195
C10orf55	0.596596	4.02172	5.46857	5.69282e-07	0.000105535	5.95793
TRPS1	0.702455	4.40777	5.46851	5.69417e-07	0.000105535	5.95771
ITGA2	1.16834	6.55973	5.46805	5.70484e-07	0.000105535	5.95595
ISM1	0.768468	5.12745	5.45697	5.96524e-07	0.000109243	5.91408
LEPREL2	0.178116	4.85118	5.4556	5.99844e-07	0.000109243	5.90888
PKM	0.621338	7.63689	5.45407	6.03552e-07	0.000109243	5.9031
BEAN1	0.200898	5.2059	5.45174	6.09244e-07	0.000109485	5.8943
CST1	1.61343	5.52408	5.44296	6.31168e-07	0.000112621	5.86114
ADPRHL2	0.244557	5.18403	5.43981	6.39222e-07	0.000113255	5.84925
SPRY4	0.42322	5.87472	5.42592	6.75956e-07	0.000118926	5.79684
CAP1	0.428043	7.72346	5.42298	6.83981e-07	0.000119502	5.78578
TRIM62	0.14616	4.46356	5.41756	6.99031e-07	0.000120771	5.76537
LOC553103	-0.505577	5.70969	-5.40457	7.3647e-07	0.000126047	5.71644
LEPRE1	0.427776	5.34602	5.39968	7.51085e-07	0.000127679	5.69802
CNN1	0.630111	4.94054	5.38675	7.91058e-07	0.000133572	5.6494
TLR9	0.255277	5.24357	5.37159	8.40619e-07	0.00014006	5.59243
BNIP3L	0.407577	6.98174	5.36778	8.53547e-07	0.000140767	5.57812
KIAA0907	-0.354418	5.95099	-5.3658	8.60315e-07	0.000140767	5.57072
KCTD11	0.386493	5.07064	5.36335	8.68793e-07	0.000140767	5.56153
PRKCDBP	0.350913	6.07258	5.36175	8.74405e-07	0.000140767	5.55549
PTK7	0.351534	4.78888	5.36108	8.76735e-07	0.000140767	5.553
RNF24	0.497317	5.35071	5.3596	8.81948e-07	0.000140767	5.54744
TAGLN	0.55035	6.08453	5.35871	8.8511e-07	0.000140767	5.54409
F11	-1.01721	3.88777	-5.35744	8.8962e-07	0.000140767	5.53932
TCEA3	-0.472676	5.52881	-5.35245	9.07549e-07	0.000142706	5.52062
SLC6A6	0.64317	5.35307	5.34912	9.19702e-07	0.000143719	5.50815
GKAP1	-0.384274	4.1739	-5.34622	9.30419e-07	0.000144496	5.49729
DAPK3	0.219754	5.47182	5.34433	9.37473e-07	0.000144699	5.49021
SLC39A13	0.15954	5.68366	5.3364	9.67677e-07	0.00014845	5.46049
NOTCH3	0.370642	5.65277	5.33187	9.85349e-07	0.000150245	5.44353
EGLN3	1.01113	4.76695	5.32885	9.97311e-07	0.000151153	5.43222
ELOVL1	0.366661	6.32944	5.32212	1.02443e-06	0.000154333	5.40707
FAP	0.852168	4.26753	5.31303	1.0623e-06	0.000158457	5.37305
DUSP7	0.308483	6.32549	5.30975	1.07626e-06	0.000158757	5.36082
AK3	-0.280185	5.91912	-5.30564	1.09403e-06	0.000158757	5.34547
RALA	0.395043	5.28323	5.30528	1.0956e-06	0.000158757	5.34413
TFR2	-0.641756	5.52948	-5.30481	1.09766e-06	0.000158757	5.34237
MYL9	0.756847	8.68651	5.30474	1.09796e-06	0.000158757	5.34211
NES	0.556665	5.46591	5.30089	1.11497e-06	0.000159805	5.32771
PANK1	-0.377087	4.61795	-5.30021	1.11799e-06	0.000159805	5.32517
MIR570	-0.607136	2.92948	-5.2988	1.12427e-06	0.000159805	5.31992
PLOD2	1.12668	5.929	5.29542	1.13949e-06	0.000161059	5.30732
CELSR1	0.293004	4.59965	5.29398	1.14608e-06	0.000161085	5.30192
PCDH7	0.727575	4.0935	5.29008	1.164e-06	0.000162695	5.28739
ANTXR1	0.955056	5.65048	5.28494	1.18806e-06	0.000164429	5.26822
PPAPDC1A	0.589538	4.72446	5.28464	1.18948e-06	0.000164429	5.2671
TPM4	0.359633	8.09384	5.2786	1.2184e-06	0.000167506	5.24459
BTBD9-AS1	-0.446282	3.94406	-5.2768	1.22715e-06	0.000167792	5.23789
SKI	0.245232	5.77879	5.26554	1.28337e-06	0.000174531	5.19592
UBASH3B	1.01533	5.66788	5.26326	1.29503e-06	0.000175012	5.18744
FSTL1	0.670158	6.39385	5.26214	1.30081e-06	0.000175012	5.18327
NREP	0.460617	5.28973	5.25666	1.32944e-06	0.000177911	5.16288
SERPINH1	0.372874	5.55647	5.2461	1.38633e-06	0.000184543	5.12363
GREM1	1.15517	6.24094	5.24155	1.41162e-06	0.00018692	5.1067
TNNT1	0.813846	5.14195	5.23635	1.44102e-06	0.000189814	5.08739
PLK3	0.298622	5.02395	5.23138	1.4697e-06	0.000191091	5.06893
TTPA	-1.15283	5.28802	-5.2308	1.47307e-06	0.000191091	5.06678
KLKB1	-1.1309	3.97533	-5.23073	1.4735e-06	0.000191091	5.06651
COL11A1	0.73968	4.3129	5.21984	1.53841e-06	0.000198487	5.02613
RAB31	0.925508	6.77388	5.21695	1.55612e-06	0.000199747	5.01542
FLJ42709	0.366985	4.74423	5.21556	1.56474e-06	0.000199835	5.01024
MIR548A3	-0.397062	6.56592	-5.21289	1.58134e-06	0.000199943	5.00036
MFSD12	0.222321	5.5582	5.21287	1.58149e-06	0.000199943	5.00027
UNC5B	0.386192	6.08516	5.20428	1.63612e-06	0.000205816	4.96847
ACADM	-0.511919	5.87641	-5.19923	1.66916e-06	0.000208927	4.94975
N4BP2	-0.422124	4.76787	-5.19637	1.68814e-06	0.000210257	4.93916
IGFBP3	0.765319	6.69691	5.19259	1.71353e-06	0.000212368	4.92519
ITGB4	0.66175	6.1845	5.18891	1.7386e-06	0.000214418	4.91159
MYO9B	0.30191	5.85721	5.18518	1.76441e-06	0.000215551	4.89779
HNF1A-AS1	-0.574199	7.28958	-5.18511	1.76492e-06	0.000215551	4.89752
FOXF2	0.571997	3.72354	5.18353	1.77592e-06	0.000215847	4.8917
CERCAM	0.28594	5.33619	5.1746	1.83967e-06	0.000221913	4.85868
COL8A2	0.182332	4.75457	5.17408	1.84347e-06	0.000221913	4.85675
DCAF8	-0.324986	6.20722	-5.16974	1.87531e-06	0.00022416	4.84072
BCAT1	0.596725	4.25683	5.16911	1.87995e-06	0.00022416	4.8384
DPYSL3	0.738117	5.47198	5.16704	1.89537e-06	0.000224932	4.83076
GPX8	1.04757	4.85484	5.15996	1.94904e-06	0.000230215	4.80462
CLYBL-IT1	-0.183712	5.83973	-5.15868	1.95882e-06	0.00023029	4.79993
PHLDA2	0.423768	6.42685	5.15002	2.02686e-06	0.000236537	4.76797
CATSPER1	0.215594	3.81006	5.14953	2.03077e-06	0.000236537	4.76617
MFAP2	0.352617	5.88607	5.1444	2.07218e-06	0.000240249	4.74727
TGFBR1	0.654326	6.74878	5.14186	2.09298e-06	0.000241547	4.73792
SLC2A1	1.04903	5.66491	5.14027	2.10614e-06	0.000241956	4.73205
LINC00500	-0.217793	5.3787	-5.13653	2.13735e-06	0.000244426	4.71829
CFL1	0.184743	6.25835	5.12765	2.21331e-06	0.000251044	4.68561
ISLR	0.478921	4.87523	5.12744	2.21518e-06	0.000251044	4.68481
PLEKHM2	0.276584	5.56488	5.11344	2.34039e-06	0.000261724	4.63336
RAI14	0.510398	5.18369	5.11341	2.34063e-06	0.000261724	4.63326
KRT19	0.9392	7.1681	5.11003	2.37197e-06	0.000264055	4.62082
TIMP3	0.648057	6.66973	5.09672	2.49906e-06	0.000276978	4.57198
SLC10A5	-0.737772	3.68317	-5.09175	2.54821e-06	0.000281186	4.55376
RNU7-67P	-0.334769	3.30115	-5.08945	2.57128e-06	0.000282492	4.54533
AGPAT4	0.348088	4.04674	5.08637	2.60251e-06	0.000283609	4.53403
ARL4C	0.884791	7.02332	5.08623	2.60399e-06	0.000283609	4.5335
CALU	0.51288	8.0293	5.08461	2.62053e-06	0.000284181	4.52757
MIR4675	0.484395	3.99946	5.08223	2.64502e-06	0.000285606	4.51887
METTL7A	-0.6686	6.4385	-5.079	2.67879e-06	0.000288016	4.50701
ADAM19	0.425768	5.16759	5.07556	2.71505e-06	0.000290672	4.49443
ENO2	0.664648	5.2829	5.06908	2.78482e-06	0.000296879	4.47069
ASAP2	0.66482	5.91124	5.05854	2.90191e-06	0.000308055	4.43217
YIF1B	0.200877	6.60026	5.05708	2.91854e-06	0.00030852	4.42682
COMP	0.787815	5.56517	5.05444	2.94886e-06	0.00031042	4.41716
TPM2	0.521416	7.11511	5.0502	2.99808e-06	0.000313474	4.40167
PKDREJ	0.249752	4.40545	5.04818	3.02184e-06	0.000314159	4.39429
G6PC	-1.57296	5.67516	-5.03965	3.12415e-06	0.000322615	4.36315
FAM129B	0.356652	5.60341	5.03857	3.13728e-06	0.000322615	4.35923
INPP4B	0.891941	4.11213	5.03822	3.14165e-06	0.000322615	4.35793
SRM	0.290293	6.05781	5.02777	3.27228e-06	0.000334664	4.31983
SSU72	0.240063	5.85844	5.0105	3.49999e-06	0.000356397	4.25693
CD109	0.959009	3.95329	5.00954	3.51311e-06	0.000356397	4.25343
DCBLD2	1.20886	5.99283	5.00843	3.52828e-06	0.000356498	4.2494
CAPZB	0.255324	6.21255	5.00623	3.55861e-06	0.000357099	4.2414
LTBP2	0.632004	6.10317	5.00594	3.56262e-06	0.000357099	4.24035
SLC10A3	0.194443	5.31095	5.00253	3.61016e-06	0.000358627	4.22796
CPXM1	0.337124	4.47891	5.00244	3.61154e-06	0.000358627	4.2276
SPARC	0.509242	8.19838	5.00179	3.62063e-06	0.000358627	4.22525
HCG25	-0.229798	5.92376	-4.99519	3.7147e-06	0.000366502	4.20127
RNF19B	0.499831	6.15787	4.99222	3.75784e-06	0.00036931	4.19048
PCCA	-0.752835	6.01477	-4.99073	3.77971e-06	0.000370015	4.18505
MEX3D	0.244956	6.26482	4.98478	3.86802e-06	0.000377192	4.16346
ATP13A2	0.207962	4.90095	4.98207	3.90905e-06	0.000379721	4.1536
TTC28-AS1	-0.208824	4.09863	-4.97831	3.96648e-06	0.000382565	4.13997
VDR	0.447351	4.4124	4.97816	3.96873e-06	0.000382565	4.13944
S1PR3	0.599602	4.70179	4.97511	4.016e-06	0.000384743	4.12837
THEM4	-0.350264	5.11118	-4.97473	4.02191e-06	0.000384743	4.12699
ZNF33A	-0.427327	5.13304	-4.96986	4.09863e-06	0.000390596	4.10934
PPP1R18	0.330402	5.93863	4.96717	4.14159e-06	0.000391753	4.09959
SERPINA6	-1.1842	5.99543	-4.96715	4.14191e-06	0.000391753	4.09952
RNU6-21	-0.341091	5.64362	-4.96287	4.21121e-06	0.000395589	4.08401
C11orf54	-0.729092	6.55455	-4.96184	4.22818e-06	0.000395589	4.08025
MAGEL2	0.166566	3.55389	4.96175	4.22964e-06	0.000395589	4.07993
TRIM52	-0.415299	5.66137	-4.93175	4.75044e-06	0.000441492	3.97142
RIC8A	0.237782	5.51756	4.93147	4.75553e-06	0.000441492	3.97042
IGFL2	0.610846	3.59296	4.93023	4.77833e-06	0.000441978	3.96595
MON2	-0.375172	6.03487	-4.9261	4.85531e-06	0.000447453	3.95102
DBNL	0.186474	5.57005	4.91731	5.02281e-06	0.0004612	3.91934
AGAP5	-0.311745	6.1895	-4.91145	5.1378e-06	0.000469392	3.8982
PPP6R1	0.238854	6.00417	4.91087	5.14934e-06	0.000469392	3.8961
ICMT	0.285702	6.00193	4.90985	5.16963e-06	0.000469541	3.89243
ANKAR	-0.270602	3.73696	-4.90679	5.23106e-06	0.000473411	3.88139
LGALS1	0.572869	8.4021	4.90312	5.30563e-06	0.000478438	3.86817
FOXC2	0.278812	4.48353	4.89628	5.44724e-06	0.000487986	3.84357
LOXL1	0.544667	5.74986	4.89614	5.4503e-06	0.000487986	3.84304
SOS1-IT1	-0.208489	5.4417	-4.89385	5.49848e-06	0.000489578	3.83482
RRAS	0.576367	5.86742	4.89345	5.507e-06	0.000489578	3.83338
LMNB2	0.266603	5.90574	4.89014	5.57761e-06	0.000494109	3.82148
HOPX	0.370088	4.16872	4.88794	5.62501e-06	0.00049656	3.81358
MAOA	-0.833984	5.44551	-4.88425	5.70567e-06	0.000501919	3.80028
FAM214B	0.179973	4.79742	4.88222	5.75031e-06	0.000502479	3.793
LOC100128505	-0.139911	2.60252	-4.88214	5.75197e-06	0.000502479	3.79273
MIR492	0.711863	4.13998	4.87884	5.82568e-06	0.000507157	3.78084
SPAG4	0.32863	4.72769	4.87545	5.90199e-06	0.000512028	3.76869
ACTA2	0.600458	7.20754	4.87236	5.97251e-06	0.000516365	3.7576
SH3BGRL3	0.341245	7.23871	4.8686	6.05955e-06	0.000521563	3.74409
GRN	0.329348	7.0641	4.86786	6.07689e-06	0.000521563	3.74142
VASP	0.323485	5.79351	4.86709	6.09482e-06	0.000521563	3.73867
DDR2	0.596381	4.38279	4.86452	6.1552e-06	0.000524945	3.72947
LOC100527964	-0.396562	3.53596	-4.86346	6.18048e-06	0.00052532	3.72564
AEBP1	0.74726	6.60073	4.85961	6.27238e-06	0.000531336	3.71186
NPDC1	0.213195	5.92032	4.85204	6.4575e-06	0.000544355	3.68471
NADKD1	-0.595733	5.78454	-4.85156	6.46934e-06	0.000544355	3.683
ECHDC2	-0.443082	6.23837	-4.84644	6.59772e-06	0.000553307	3.66465
LTBP1	0.96412	6.49079	4.84231	6.703e-06	0.000560269	3.64987
OCLM	-0.653476	5.27582	-4.82876	7.06006e-06	0.000588159	3.60143
PLXNA1	0.30089	5.36334	4.8263	7.1268e-06	0.000591759	3.59265
SPRYD4	-0.374396	6.14678	-4.82431	7.18142e-06	0.000594333	3.58553
C1orf27	-0.390479	6.32537	-4.82114	7.26917e-06	0.000598044	3.57419
VCL	0.500754	6.92278	4.82097	7.2738e-06	0.000598044	3.5736
KANSL3	-0.215296	5.71682	-4.81964	7.311e-06	0.000598941	3.56884
F10	-0.502988	4.85188	-4.81888	7.33232e-06	0.000598941	3.56612
RANBP10	-0.232705	5.12072	-4.81536	7.43171e-06	0.000605095	3.55355
NID2	0.475251	5.00864	4.80972	7.59344e-06	0.000616269	3.53346
LDHA	0.426873	7.17912	4.80329	7.78233e-06	0.00062755	3.51054
HAPLN3	0.311039	4.83045	4.80139	7.83912e-06	0.00063011	3.50375
RHOBTB1	0.411941	4.41492	4.79786	7.94561e-06	0.000635073	3.49116
COL2A1	0.143737	4.73463	4.79749	7.95665e-06	0.000635073	3.48987
EFEMP2	0.52606	6.55868	4.7961	7.99895e-06	0.000635073	3.48492
OLFML2B	0.539337	4.62414	4.79601	8.00184e-06	0.000635073	3.48458
AS3MT	-0.935604	4.81626	-4.79497	8.03373e-06	0.000635599	3.48087
FSCN1	0.457181	6.00872	4.78984	8.19245e-06	0.000646125	3.46262
MRVI1	0.44699	4.595	4.78477	8.35235e-06	0.000656433	3.44458
FHOD1	0.156511	4.46301	4.78405	8.37533e-06	0.000656433	3.44202
SCARF2	0.207092	5.24929	4.78191	8.44382e-06	0.000659745	3.43442
PLIN3	0.289338	5.34841	4.77449	8.68595e-06	0.000674532	3.40805
PELO	0.38405	5.67659	4.77447	8.68668e-06	0.000674532	3.40797
FOXD3	0.164331	3.61724	4.76856	8.8845e-06	0.000687745	3.38697
MIR548X	-0.511396	7.57292	-4.76776	8.91151e-06	0.000687745	3.38414
MTHFD1L	0.317879	4.95571	4.765	9.00581e-06	0.000692897	3.37432
CLSTN1	0.505343	6.16155	4.76188	9.11316e-06	0.000699018	3.36327
RIN2	0.490157	5.63818	4.76056	9.15904e-06	0.000700402	3.35858
BMP8A	0.198848	4.61183	4.75652	9.30081e-06	0.000708053	3.34426
DLG4	0.192079	4.57869	4.75611	9.31538e-06	0.000708053	3.3428
MRAS	0.314971	5.42483	4.75414	9.38562e-06	0.000710718	3.33579
MAN2B2	0.201866	5.35751	4.75354	9.40693e-06	0.000710718	3.33368
COL6A2	0.36949	5.8838	4.75255	9.44218e-06	0.000711245	3.33019
RCN3	0.377348	4.9994	4.74389	9.75827e-06	0.000731267	3.29948
APLP2	0.428269	8.40315	4.74368	9.76612e-06	0.000731267	3.29873
ARHGAP23	0.308224	4.46188	4.74005	9.90169e-06	0.000737893	3.28588
FBN1	0.8518	6.10265	4.73923	9.93244e-06	0.000737893	3.28299
ENC1	0.541946	4.84596	4.73896	9.94259e-06	0.000737893	3.28204
CSAD	-0.244864	5.55089	-4.73727	1.00066e-05	0.00074018	3.27605
TUBA1A	0.315933	7.6715	4.73659	1.00323e-05	0.00074018	3.27366
SUSD2	0.232677	5.34469	4.73559	1.00706e-05	0.000740835	3.27011
ATAD3A	0.149925	5.01609	4.73406	1.01292e-05	0.000742973	3.2647
PMAIP1	0.816333	4.66489	4.73291	1.01735e-05	0.000744058	3.26063
CNPY4	0.287475	5.03119	4.72943	1.03088e-05	0.000751765	3.24831
KDELR1	0.357018	8.5209	4.72675	1.04139e-05	0.000757236	3.23885
COL10A1	1.06722	5.52142	4.72545	1.04653e-05	0.000758781	3.23426
ANTXR2	0.509017	5.68225	4.72338	1.05478e-05	0.000762564	3.22694
MSN	0.533921	7.98552	4.72233	1.059e-05	0.000763424	3.22322
HGD	-1.07806	6.13509	-4.71969	1.06965e-05	0.000766767	3.21389
PDPN	0.630865	4.64118	4.71966	1.06974e-05	0.000766767	3.21382
MAP1A	0.392365	3.78861	4.71656	1.08241e-05	0.00077172	3.20284
CST4	1.12409	4.90157	4.71647	1.08278e-05	0.00077172	3.20252
STARD4-AS1	0.506811	4.80676	4.70875	1.11487e-05	0.000790112	3.1753
ADA	0.233948	4.58316	4.70371	1.13634e-05	0.000803064	3.15752
ARF4	0.322379	7.10609	4.69945	1.15479e-05	0.000812882	3.14251
ARPC1B	0.286709	7.09573	4.69902	1.15669e-05	0.000812882	3.14097
SFRP1	0.385441	5.38159	4.69728	1.16429e-05	0.000815942	3.13487
PI4K2A	0.286146	4.82158	4.69596	1.17014e-05	0.000817764	3.1302
CDNF	-0.282715	3.76847	-4.69505	1.17418e-05	0.000818064	3.12698
ZNF658	-0.234392	4.27366	-4.6944	1.17707e-05	0.000818064	3.12469
DUSP4	0.359237	4.42471	4.69257	1.1852e-05	0.000821448	3.11828
EDNRA	0.85029	4.98366	4.69063	1.19393e-05	0.000824293	3.11144
KANK1	-0.359997	4.51939	-4.6902	1.19586e-05	0.000824293	3.10993
TSPAN2	0.51469	3.95436	4.68828	1.20458e-05	0.000828036	3.10316
PLP2	0.522458	8.51046	4.68523	1.21852e-05	0.00083533	3.09245
INTS3	-0.520828	6.3452	-4.66892	1.29587e-05	0.000883543	3.0351
B4GALT2	0.201531	5.77324	4.6651	1.31464e-05	0.000893922	3.0217
2024-09-11	0.416651	6.25418	4.66263	1.32696e-05	0.000899863	3.01301
PDZRN3	0.251837	3.6356	4.66112	1.33453e-05	0.000902568	3.00771
ALDH1L2	0.419787	3.55368	4.65975	1.34143e-05	0.0009048	3.0029
P4HA2-AS1	0.338168	3.7255	4.65781	1.35124e-05	0.000908977	2.99612
VCAN-AS1	0.79909	5.89352	4.65371	1.37227e-05	0.000920668	2.98173
ZNF33B	-0.473706	5.13811	-4.65273	1.37734e-05	0.000921606	2.9783
MIR4531	-0.529542	6.31176	-4.64695	1.40759e-05	0.000938227	2.95806
CALM1	0.319473	7.63947	4.64657	1.40963e-05	0.000938227	2.95671
AGAP4	-0.409284	6.72844	-4.64138	1.4374e-05	0.000954181	2.93854
ARHGEF25	0.310488	4.96283	4.63884	1.45117e-05	0.00096079	2.92966
GLS2	-0.247846	3.99518	-4.63687	1.46198e-05	0.000965406	2.92275
ADAM12	0.50928	4.01274	4.63528	1.47072e-05	0.000968636	2.9172
ADAMTS7	0.140064	4.83819	4.6345	1.47505e-05	0.000968948	2.91446
PLK1S1	-0.30653	4.52807	-4.63294	1.48369e-05	0.000970846	2.90902
FAM176B	0.209251	5.06876	4.63259	1.48565e-05	0.000970846	2.90779
ULBP2	0.325246	4.1475	4.63069	1.49628e-05	0.000975258	2.90115
LTBP4	0.222219	5.60007	4.62864	1.50784e-05	0.00098025	2.89399
ACTG1	0.330947	10.0308	4.62766	1.51341e-05	0.000981336	2.89055
MLXIPL	-0.508757	5.12045	-4.62433	1.53244e-05	0.000991125	2.87891
FAM57A	0.555266	5.6174	4.62195	1.54622e-05	0.000997473	2.87058
HES4	0.206691	5.54941	4.62115	1.55082e-05	0.000997603	2.86781
OPCML	0.1788	3.73599	4.62055	1.55436e-05	0.000997603	2.86569
IPO9-AS1	0.264577	5.17195	4.61346	1.59618e-05	0.00102184	2.84097
FHL3	0.297278	5.44206	4.61181	1.60612e-05	0.00102547	2.83519
ISG15	0.399224	5.89237	4.61064	1.61316e-05	0.00102547	2.83112
ACTA1	0.256171	6.07787	4.61012	1.61629e-05	0.00102547	2.82931
MIR606	-0.551158	6.11605	-4.60982	1.61815e-05	0.00102547	2.82824
PCSK7	0.213596	5.1727	4.60796	1.62945e-05	0.00103003	2.82177
KIAA0930	0.183254	5.60978	4.60691	1.63587e-05	0.00103084	2.8181
PTAR1	-0.508558	5.61155	-4.60641	1.63893e-05	0.00103084	2.81636
KIAA0247	0.386209	6.39004	4.60527	1.64596e-05	0.00103268	2.81238
NOG	0.328401	3.22821	4.60401	1.6537e-05	0.00103496	2.80801
CTNNBIP1	0.200566	5.30186	4.60152	1.66922e-05	0.00104208	2.79931
DECR1	-0.364091	5.13733	-4.59632	1.70202e-05	0.00105993	2.7812
MYH11	0.729592	5.6104	4.59439	1.71433e-05	0.00106496	2.77449
DVL1	0.171148	5.5781	4.59246	1.72678e-05	0.00107005	2.76776
NBPF24	-0.386421	7.85344	-4.5911	1.73554e-05	0.00107283	2.76305
SUPV3L1	-0.321822	5.46782	-4.59038	1.74022e-05	0.00107309	2.76054
NPTX1	0.439309	3.7783	4.58257	1.7918e-05	0.00110202	2.73335
CCNT2	-0.343981	6.43565	-4.58196	1.79589e-05	0.00110202	2.73123
ZNF346	-0.20684	4.69321	-4.58055	1.80538e-05	0.00110515	2.72633
BMS1P5	-0.420763	7.19316	-4.57878	1.81736e-05	0.00110978	2.72017
COL13A1	0.148305	4.52393	4.57393	1.85054e-05	0.00112731	2.70333
TSPYL4	0.290407	4.14859	4.56804	1.89166e-05	0.00114699	2.68288
HM13-AS1	-0.330667	4.89986	-4.56799	1.89197e-05	0.00114699	2.68273
REEP3	0.44648	7.3446	4.56193	1.93525e-05	0.00117041	2.66169
TWIST2	0.34019	4.22668	4.55897	1.95673e-05	0.00118056	2.65142
SPIN2A	-0.400184	4.86436	-4.55678	1.97271e-05	0.00118727	2.64385
PLCB3	0.28849	5.33483	4.55457	1.98903e-05	0.00118727	2.63618
SHISA2	0.32464	4.33192	4.55453	1.98931e-05	0.00118727	2.63605
SHMT1	-0.46907	5.14592	-4.55425	1.99143e-05	0.00118727	2.63506
AKR1C4	-0.906079	4.34732	-4.55425	1.99145e-05	0.00118727	2.63505
FMO5	-1.34911	5.29298	-4.55235	2.00556e-05	0.00119286	2.62848
GAL3ST4	0.335299	5.22912	4.55063	2.01841e-05	0.00119759	2.62254
ZBTB20-AS3	-0.273595	4.14541	-4.54952	2.02677e-05	0.00119759	2.61869
AKR1C1	-1.18881	6.52137	-4.54939	2.0278e-05	0.00119759	2.61822
SLC17A2	-0.924692	3.4985	-4.548	2.03833e-05	0.00120037	2.61341
LOC644093	-0.133141	3.73702	-4.5473	2.04363e-05	0.00120037	2.61099
SCG5	0.443267	3.66468	4.54688	2.04682e-05	0.00120037	2.60954
CDCP1	0.867274	6.07365	4.54589	2.05437e-05	0.00120199	2.60612
CHST3	0.510043	4.44006	4.54167	2.0869e-05	0.00121469	2.5915
CSNK1E	0.169299	6.19069	4.54094	2.09258e-05	0.00121469	2.58897
MIR548D1	-0.258147	11.2579	-4.54079	2.09373e-05	0.00121469	2.58846
THY1	0.439344	5.98877	4.54058	2.09538e-05	0.00121469	2.58773
FOXI2	0.183842	4.62703	4.53816	2.11431e-05	0.00122028	2.57936
ADHFE1	-0.699645	4.38778	-4.53749	2.11956e-05	0.00122028	2.57705
ACTC1	0.20245	4.48729	4.53749	2.11956e-05	0.00122028	2.57705
TNFSF4	0.549293	3.04179	4.53623	2.12947e-05	0.00122318	2.57272
CST6	0.429659	4.3746	4.53324	2.1533e-05	0.00123405	2.56237
PKIB	0.409503	3.27779	4.52909	2.18678e-05	0.0012484	2.54802
PPP2R5B	0.178136	4.22895	4.52873	2.18966e-05	0.0012484	2.54679
C9orf69	0.194209	4.94629	4.52772	2.19789e-05	0.0012484	2.5433
LIMK1	0.251904	5.16462	4.52738	2.20067e-05	0.0012484	2.54213
SCP2	-0.54395	6.51509	-4.52708	2.20315e-05	0.0012484	2.54108
RXFP1	0.213902	2.52951	4.5255	2.21615e-05	0.00125295	2.53561
ZNF491	-0.13307	3.7282	-4.52477	2.2221e-05	0.00125349	2.53312
AGAP9	-0.389655	6.68508	-4.51643	2.29197e-05	0.00129002	2.50432
EHD2	0.388576	6.20374	4.51558	2.2992e-05	0.00129119	2.5014
SUMO1P3	-0.436187	6.06334	-4.51063	2.34175e-05	0.00131216	2.48434
SERTAD4	0.217011	3.24451	4.50881	2.35763e-05	0.00131813	2.47806
MIR548AD	-0.24561	11.3569	-4.50593	2.38297e-05	0.00132934	2.46812
XYLT1	0.35919	4.69075	4.50288	2.41002e-05	0.00134145	2.45763
ELMOD1	0.127475	3.33671	4.49989	2.43683e-05	0.00135338	2.44734
TREM1	0.697906	3.98797	4.49614	2.47088e-05	0.00136814	2.43444
GABPB1-AS1	-0.359014	5.18419	-4.49577	2.47428e-05	0.00136814	2.43316
TMEM200A	0.69995	4.40232	4.49481	2.48306e-05	0.00136998	2.42987
BSG	0.257075	7.31994	4.49284	2.50125e-05	0.001377	2.42308
IQSEC2	0.198293	4.24689	4.49183	2.51064e-05	0.00137915	2.4196
NSUN6	-0.652774	5.1126	-4.48845	2.54218e-05	0.00139343	2.408
ANGPT2	0.586985	5.41391	4.48606	2.56475e-05	0.00140137	2.39978
NR2F1	0.378258	5.74546	4.48574	2.56779e-05	0.00140137	2.39868
NDRG2	-0.422856	6.7198	-4.48318	2.59226e-05	0.00141166	2.38987
SFXN4	-0.419765	4.95155	-4.47958	2.62692e-05	0.00142744	2.37752
ZNF346-IT1	-0.215356	6.61792	-4.47832	2.63923e-05	0.00143104	2.37318
MYO1D	0.602035	6.53524	4.47611	2.66085e-05	0.00143966	2.36559
AGAP7	-0.434661	7.16869	-4.47504	2.67132e-05	0.00144222	2.36194
PDGFRB	0.53541	6.1019	4.47357	2.68588e-05	0.00144698	2.35689
MACF1	0.343545	6.96197	4.47211	2.7004e-05	0.00145169	2.35188
PPP1R14B	0.258783	6.53271	4.46598	2.76221e-05	0.00148176	2.33085
ST14	0.520022	6.01109	4.46518	2.77035e-05	0.00148296	2.32812
OGDHL	-0.363144	4.63519	-4.4601	2.82271e-05	0.00150778	2.31072
UNC93B1	0.290341	5.58113	4.45919	2.83219e-05	0.00150964	2.3076
TNFSF14	-0.579399	4.78903	-4.45832	2.84128e-05	0.00151129	2.30462
AP2S1	0.329379	7.53656	4.45717	2.85332e-05	0.0015128	2.3007
ZNF598	0.137355	5.3673	4.4569	2.85615e-05	0.0015128	2.29978
MICALCL	0.16921	3.43007	4.45529	2.87322e-05	0.00151774	2.29424
MIR548Q	-0.232034	5.35965	-4.45488	2.87755e-05	0.00151774	2.29284
EMILIN1	0.226791	5.62149	4.45144	2.91417e-05	0.00153384	2.28109
RHOA	0.166646	8.7921	4.44224	3.01462e-05	0.0015834	2.24961
PRPF3	-0.38646	6.1026	-4.44	3.03953e-05	0.00159076	2.24196
QPCT	0.592113	4.41252	4.43984	3.04128e-05	0.00159076	2.24143
NLGN2	0.233302	4.24875	4.43601	3.08447e-05	0.00161	2.22833
YY1AP1	-0.23307	6.61397	-4.42958	3.15819e-05	0.00164507	2.20639
IMPDH1	0.185682	5.51911	4.42872	3.16816e-05	0.00164685	2.20347
PACS2	0.156559	5.29368	4.42777	3.17927e-05	0.00164845	2.20022
CHTOP	-0.3757	6.68015	-4.42734	3.18433e-05	0.00164845	2.19874
DYNC1H1	0.31075	7.13348	4.42522	3.20913e-05	0.00165659	2.19153
C16orf45	0.466495	4.76723	4.42487	3.21323e-05	0.00165659	2.19035
PMF1	-0.176048	5.90654	-4.42421	3.22102e-05	0.00165721	2.1881
HSD17B4	-0.359204	6.44891	-4.42276	3.23827e-05	0.00166269	2.18314
SERINC5	-0.478937	5.86307	-4.4194	3.27849e-05	0.00167991	2.17167
LOC220729	-0.29278	6.33062	-4.41827	3.29213e-05	0.00168347	2.16782
RNU7-5P	-0.522978	4.68868	-4.41383	3.34609e-05	0.00170718	2.15272
CSPG4	0.180256	4.92847	4.41334	3.35207e-05	0.00170718	2.15106
SUOX	-0.226805	5.05904	-4.41013	3.39177e-05	0.00172391	2.14013
ACAT1	-0.603694	5.63542	-4.40794	3.4191e-05	0.0017343	2.13268
MIR548F3	-0.195321	5.80594	-4.40114	3.50531e-05	0.00177445	2.10956
RNU7-59P	-0.33851	2.56129	-4.39992	3.52104e-05	0.00177883	2.10541
PRPF18	-0.260684	5.51692	-4.39923	3.52999e-05	0.00177978	2.10305
LOC100422737	-0.976255	4.91689	-4.39551	3.57834e-05	0.00180055	2.09042
SEC24D	0.396442	5.61112	4.39287	3.61314e-05	0.00181443	2.08144
MMP23B	0.200756	5.62269	4.38972	3.65496e-05	0.00183177	2.07075
ADM	0.442507	5.36343	4.38784	3.68017e-05	0.00184074	2.06437
MBOAT7	0.204448	5.80139	4.38297	3.74618e-05	0.00187004	2.04787
EOGT	0.361334	4.89004	4.38229	3.75552e-05	0.00187099	2.04556
ULBP3	0.238022	3.94106	4.38133	3.76881e-05	0.0018739	2.04228
RN5S187	-0.796476	6.78775	-4.37289	3.88663e-05	0.00192795	2.01371
FLJ31306	-0.317163	6.30166	-4.37246	3.89285e-05	0.00192795	2.01223
BGN	0.611454	9.08692	4.3701	3.92643e-05	0.00194077	2.00426
MIR4324	-0.522067	3.4761	-4.36879	3.9452e-05	0.00194622	1.99984
NBPF9	-0.447138	7.73752	-4.36503	3.99978e-05	0.00196929	1.98709
RNF145	0.401533	5.32293	4.36389	4.01636e-05	0.00196977	1.98325
PNMA1	0.413378	5.47326	4.3638	4.01771e-05	0.00196977	1.98294
LEPREL4	0.185256	5.75817	4.36317	4.02691e-05	0.00196977	1.98081
GJA1	1.25821	5.85088	4.36282	4.03208e-05	0.00196977	1.97962
RAB38	0.783022	4.42538	4.36119	4.05611e-05	0.00197767	1.97411
DGKI	0.201719	3.05795	4.36023	4.07038e-05	0.00197831	1.97085
CBL	0.33532	6.19539	4.36004	4.07316e-05	0.00197831	1.97022
BVES	0.205204	3.56733	4.35908	4.08745e-05	0.00198143	1.96697
LPCAT4	0.35057	5.61896	4.35679	4.12159e-05	0.00199414	1.95925
LOC440993	-0.558178	5.67083	-4.35573	4.13755e-05	0.00199802	1.95567
SNORD11	-0.718743	4.56309	-4.35295	4.17976e-05	0.00201453	1.94625
SERPINE2	0.809662	5.3043	4.35064	4.215e-05	0.00202763	1.93846
TMCO6	-0.347493	5.14979	-4.34741	4.26488e-05	0.00204771	1.92755
EPHX2	-0.654447	4.40192	-4.3455	4.29454e-05	0.00205803	1.92112
RASA3	0.340581	4.82487	4.34415	4.31578e-05	0.00205807	1.91655
PCDH18	0.682048	3.88223	4.34388	4.31991e-05	0.00205807	1.91566
CREG2	0.22241	3.9628	4.34362	4.32404e-05	0.00205807	1.91477
STRN4	0.177771	5.39684	4.34341	4.32736e-05	0.00205807	1.91406
FBLIM1	0.216144	5.35033	4.34133	4.36019e-05	0.00206682	1.90705
GOLGA3	0.1997	6.12584	4.34084	4.36798e-05	0.00206682	1.90539
GRP	0.71465	4.47454	4.34054	4.37268e-05	0.00206682	1.9044
MIR3936	-0.652801	4.15992	-4.34017	4.37862e-05	0.00206682	1.90314
ANKRD16	-0.309666	4.59051	-4.33719	4.42635e-05	0.00208544	1.89308
ZDHHC8	0.130365	5.48954	4.3356	4.452e-05	0.00209361	1.88772
KNG1	-2.00404	5.25513	-4.33031	4.53832e-05	0.00213021	1.86991
OR2D3	0.210087	2.41024	4.3297	4.54837e-05	0.00213096	1.86786
MIR5095	-0.312095	10.3385	-4.3271	4.59149e-05	0.00214371	1.85911
RASSF3	0.356514	6.49534	4.32703	4.59263e-05	0.00214371	1.85888
LOC728190	-0.230013	5.61443	-4.32468	4.63203e-05	0.00215754	1.85096
LOC100653153	-0.260119	10.3044	-4.32392	4.64489e-05	0.00215754	1.84839
MIR548AI	-0.299559	10.903	-4.32373	4.64798e-05	0.00215754	1.84777
GPX1	0.248939	6.7401	4.32283	4.66321e-05	0.00216062	1.84474
FKBP9L	0.264329	5.80227	4.3206	4.70101e-05	0.00217413	1.83725
LOC653501	-0.271304	3.52385	-4.31903	4.72798e-05	0.00218259	1.83195
TAB3	-0.382809	4.81115	-4.31701	4.76276e-05	0.00219462	1.82515
CALM3	0.235606	7.63807	4.31514	4.79501e-05	0.00220544	1.81889
LMCD1	0.457423	5.76138	4.3145	4.80622e-05	0.00220656	1.81673
LMF2	0.163979	5.81674	4.31385	4.81747e-05	0.0022077	1.81456
ZBTB20-AS1	-0.583386	4.53303	-4.30909	4.90127e-05	0.00223881	1.79857
KANSL1L	-0.616971	6.18151	-4.30899	4.90316e-05	0.00223881	1.79822
IL11RA	-0.190504	4.79305	-4.30373	4.9974e-05	0.00227771	1.78057
AGAP6	-0.410232	7.13877	-4.30106	5.0459e-05	0.00229535	1.77162
RAMP1	0.268001	5.94358	4.30017	5.06218e-05	0.00229535	1.76863
TWSG1	0.429547	5.47605	4.3001	5.06347e-05	0.00229535	1.76839
GLYATL1	-0.810064	3.48995	-4.29828	5.09688e-05	0.00230365	1.7623
DHTKD1	-0.452066	5.03381	-4.29811	5.10009e-05	0.00230365	1.76171
TMEM158	0.237478	6.40566	4.29599	5.13922e-05	0.00231545	1.75463
LAYN	0.444899	4.19492	4.2957	5.14462e-05	0.00231545	1.75366
ITM2C	0.320556	6.0563	4.29386	5.179e-05	0.00232676	1.74748
LOC100507175	0.169978	2.51035	4.29275	5.19987e-05	0.00232944	1.74376
CALB2	0.594879	3.2877	4.2923	5.20829e-05	0.00232944	1.74226
KHDRBS1	0.199695	7.04863	4.29207	5.21275e-05	0.00232944	1.74146
HAS3	0.237706	5.98181	4.28958	5.25975e-05	0.00234405	1.73315
AFAP1	0.289691	4.57062	4.28935	5.26407e-05	0.00234405	1.73238
IQCH-AS1	-0.171006	5.54427	-4.28876	5.2753e-05	0.0023449	1.73041
LOC100507156	0.21901	3.74758	4.28796	5.29056e-05	0.00234628	1.72773
GABPB1	0.208935	5.1047	4.28762	5.29706e-05	0.00234628	1.72659
TRAM2	0.45707	6.33862	4.2865	5.31866e-05	0.00235142	1.72282
RNU7-45P	-0.584934	5.46581	-4.28586	5.3309e-05	0.00235142	1.72069
HTRA2	0.175868	4.81186	4.28556	5.33669e-05	0.00235142	1.71969
RN5S268	-1.32439	6.29739	-4.28448	5.35754e-05	0.00235648	1.71607
EIF4EBP3	-0.270434	6.59001	-4.28333	5.37992e-05	0.00235855	1.71221
ADCY3	0.201264	5.07932	4.28305	5.38536e-05	0.00235855	1.71127
ABCA5	-0.567063	4.09638	-4.28279	5.39038e-05	0.00235855	1.71041
LOC389765	-0.453807	5.74118	-4.28203	5.40517e-05	0.00236092	1.70787
SDC3	0.202133	5.76118	4.28145	5.41657e-05	0.0023618	1.70592
ENTPD5	-0.65915	5.79518	-4.28019	5.44112e-05	0.0023645	1.70173
CSN2	0.107245	2.87151	4.28017	5.44157e-05	0.0023645	1.70165
CLTB	0.362674	6.50566	4.27941	5.45646e-05	0.00236688	1.69912
SPRED1	0.412207	6.38397	4.27772	5.48985e-05	0.00237727	1.69347
SH3PXD2A	0.209921	5.10141	4.27277	5.58872e-05	0.00241194	1.67693
KLHL4	0.412782	2.69859	4.27251	5.59407e-05	0.00241194	1.67604
PILRB	-0.34869	6.19714	-4.27228	5.59869e-05	0.00241194	1.67528
WASH5P	-0.290726	6.88123	-4.27131	5.61837e-05	0.00241379	1.67203
ANGEL2	-0.282795	5.1189	-4.27112	5.62216e-05	0.00241379	1.6714
CYP2C9	-1.26646	6.16527	-4.27063	5.63214e-05	0.00241395	1.66976
PDAP1	0.291746	6.3867	4.26939	5.65731e-05	0.00241904	1.66563
IKBIP	0.385572	4.99405	4.2691	5.66325e-05	0.00241904	1.66466
PPP1R14BP3	0.484387	6.85756	4.26817	5.68225e-05	0.00242305	1.66155
RNU6-3	-0.391304	7.84986	-4.26718	5.7025e-05	0.00242524	1.65826
SFXN3	0.32553	5.83266	4.26679	5.71054e-05	0.00242524	1.65695
SLC6A16	-0.433858	4.37774	-4.26651	5.71631e-05	0.00242524	1.65602
SERPINA10	-0.942678	3.86262	-4.26564	5.73419e-05	0.00242567	1.65312
TOR1AIP2	-0.643124	7.38232	-4.26523	5.74286e-05	0.00242567	1.65172
ENTPD2	0.235003	4.82246	4.26479	5.7519e-05	0.00242567	1.65027
ZDHHC11B	-0.391608	4.29954	-4.26438	5.76033e-05	0.00242567	1.64891
STRADB	-0.587377	5.59619	-4.26413	5.76554e-05	0.00242567	1.64807
ACSM2B	-1.25573	4.83375	-4.26263	5.79675e-05	0.00243231	1.64307
ZNF782	-0.184141	4.95951	-4.26245	5.80065e-05	0.00243231	1.64245
TUBA1B	0.250085	9.91297	4.25857	5.88226e-05	0.00246242	1.62951
ALDH1L1-AS1	-0.408517	5.14133	-4.25769	5.90085e-05	0.00246448	1.62658
TTC39C	-0.645772	5.29636	-4.25741	5.90675e-05	0.00246448	1.62566
CLIP2	0.238233	5.0633	4.25691	5.91744e-05	0.00246485	1.62398
KATNAL2	-0.448367	4.18269	-4.2553	5.95177e-05	0.00247505	1.61862
AGAP8	-0.268598	6.03761	-4.25374	5.98537e-05	0.00248492	1.61341
MIR1303	-0.217762	10.0195	-4.2516	6.03147e-05	0.00249993	1.6063
LANCL3	0.12503	3.14396	4.25034	6.05884e-05	0.00250714	1.60211
GALT	-0.291825	5.10028	-4.24929	6.08191e-05	0.00251256	1.59859
ARHGAP1	0.334966	7.28291	4.24773	6.11612e-05	0.00252255	1.5934
PDZK1	-1.05637	6.58791	-4.24616	6.15067e-05	0.00252843	1.58818
PCBP1-AS1	-0.267367	5.23869	-4.24576	6.15945e-05	0.00252843	1.58686
HIST1H2BA	-0.477681	2.31367	-4.24571	6.16054e-05	0.00252843	1.58669
SRPR	0.31215	6.50053	4.24513	6.17342e-05	0.00252959	1.58476
BIVM	-0.742779	5.81913	-4.24447	6.18807e-05	0.00253147	1.58256
RALGDS	0.15543	5.33761	4.24266	6.22859e-05	0.00254392	1.57652
PCOLCE	0.278672	6.12445	4.24098	6.26623e-05	0.00255514	1.57094
NDNF	0.568832	4.49802	4.23848	6.32266e-05	0.00257398	1.56264
CCNJL	0.255603	4.60619	4.2353	6.39521e-05	0.00259931	1.55207
FAM114A1	0.405792	6.34254	4.23303	6.44762e-05	0.00261638	1.54452
FMNL3	0.381666	5.33729	4.23143	6.48468e-05	0.00262718	1.53921
HIC1	0.156302	4.3653	4.22687	6.59168e-05	0.00266624	1.52406
SUCLG1	-0.320307	5.85423	-4.22554	6.62324e-05	0.00267471	1.51964
TMEM50A	0.284055	7.41074	4.225	6.63591e-05	0.00267553	1.51787
POU3F1	0.152504	3.81293	4.22451	6.64765e-05	0.00267597	1.51623
MMP28	0.305563	4.13003	4.22275	6.68965e-05	0.00268858	1.5104
NUMBL	0.156347	5.16223	4.22144	6.72122e-05	0.00269696	1.50604
GNA15	0.332226	4.4487	4.21829	6.7975e-05	0.00272322	1.4956
SNORA16B	-0.6222	3.9542	-4.21451	6.89e-05	0.00275589	1.48308
ARCN1	0.323261	7.50664	4.2139	6.90528e-05	0.00275762	1.48103
LOC100128979	0.498625	5.30141	4.21326	6.92103e-05	0.00275915	1.47892
APOH	-1.75695	6.25669	-4.21284	6.93132e-05	0.00275915	1.47755
HPN	-0.386534	5.84207	-4.21241	6.94203e-05	0.00275915	1.47612
MTPAP	-0.152377	5.19957	-4.20931	7.01962e-05	0.00278559	1.46583
RAB17	-0.318015	4.7737	-4.20851	7.03977e-05	0.00278853	1.46318
CATSPER3	-0.284288	3.29366	-4.20771	7.05974e-05	0.00278853	1.46056
ANGPTL1	-1.07159	4.68722	-4.20769	7.06027e-05	0.00278853	1.46049
TRIB2	0.523631	5.9679	4.20601	7.10295e-05	0.00280099	1.45491
ACTN4	0.294061	7.90048	4.20379	7.15958e-05	0.0028189	1.44756
ABR	0.493933	5.90644	4.20312	7.1766e-05	0.00282119	1.44537
PNPLA6	0.157135	5.15793	4.2018	7.21072e-05	0.00283018	1.44098
RALGPS2	-0.53911	5.79365	-4.19934	7.27419e-05	0.00285064	1.43287
FLNC	0.178502	4.73999	4.19888	7.28616e-05	0.00285089	1.43134
ITGB3	0.530524	4.70004	4.19735	7.32623e-05	0.0028621	1.42627
PRAF2	0.324009	5.29124	4.19676	7.34175e-05	0.0028621	1.42431
SNORD82	-0.572344	4.01683	-4.19611	7.35868e-05	0.0028621	1.42218
OSR2	0.106728	3.73667	4.19605	7.36029e-05	0.0028621	1.42198
PDLIM3	0.531995	5.00262	4.19306	7.43926e-05	0.00288534	1.4121
SDHAP2	-0.327889	6.5899	-4.19292	7.44301e-05	0.00288534	1.41164
BAAT	-1.09921	7.08464	-4.19081	7.49934e-05	0.00290271	1.40466
FKBP10	0.553714	6.13423	4.18926	7.54097e-05	0.00291278	1.39954
RGL4	-0.181332	4.63482	-4.18898	7.54852e-05	0.00291278	1.39861
RNF5	-0.283896	5.77867	-4.18775	7.58162e-05	0.00291567	1.39457
MIR548F1	-0.160151	5.66586	-4.18742	7.59059e-05	0.00291567	1.39347
ITGA1	0.684516	6.62978	4.18741	7.59078e-05	0.00291567	1.39345
STAG3L1	-0.363144	6.49835	-4.18652	7.61483e-05	0.00292045	1.39052
CCDC147	0.0828644	3.22179	4.18438	7.67341e-05	0.00293844	1.38343
DOCK6	0.230916	5.34036	4.18282	7.71602e-05	0.00295019	1.37831
MIR548D2	-0.270646	10.2785	-4.1824	7.72754e-05	0.00295019	1.37693
ACTR3C	-0.447303	5.74756	-4.1819	7.7415e-05	0.00295086	1.37526
LOC399753	-0.420557	7.705	-4.18149	7.75278e-05	0.00295086	1.37391
SLC6A9	0.270741	4.81383	4.17891	7.82429e-05	0.00297075	1.36542
ILK	0.344707	7.40341	4.17876	7.82864e-05	0.00297075	1.3649
MIR1254-1	-0.372264	8.03868	-4.17673	7.88539e-05	0.00298778	1.35822
CYTH3	0.234328	4.52203	4.17486	7.93823e-05	0.00300328	1.35205
STAG3L2	-0.352579	7.44404	-4.1738	7.96824e-05	0.0030101	1.34856
CD160	-0.187792	3.36343	-4.17257	8.00308e-05	0.00301873	1.34452
SEPSECS	-0.35457	4.98547	-4.17192	8.02168e-05	0.00301903	1.34237
MAST2	0.284802	5.26347	4.1717	8.02786e-05	0.00301903	1.34166
ZNF469	0.192085	3.77574	4.17047	8.06326e-05	0.00302782	1.33759
ATP5C1	-0.373676	7.61049	-4.16962	8.08766e-05	0.00303245	1.3348
CMTM7	0.462108	5.21037	4.16702	8.16282e-05	0.00305132	1.32624
ACTR2	0.200556	7.96779	4.16692	8.16576e-05	0.00305132	1.32591
CYP3A5	-1.12481	7.84473	-4.16662	8.17437e-05	0.00305132	1.32493
TSPAN5	0.346828	3.74926	4.16209	8.30716e-05	0.0030963	1.31003
LINC00261	-1.03822	5.22521	-4.15848	8.41458e-05	0.00312325	1.29815
KDM3A	0.326573	5.77121	4.1582	8.42285e-05	0.00312325	1.29724
DCAF6	-0.453735	6.7636	-4.15816	8.42412e-05	0.00312325	1.2971
SPSB1	0.284415	6.0761	4.15799	8.42913e-05	0.00312325	1.29655
CARD11	0.394694	4.69926	4.15644	8.47587e-05	0.00313595	1.29144
MEIS3	0.147352	4.82842	4.15485	8.52389e-05	0.00314908	1.28622
MYOF	0.660255	6.84394	4.15408	8.54719e-05	0.00315306	1.28369
PIP5K1C	0.142427	5.38135	4.15297	8.58083e-05	0.00316083	1.28006
FAM35B2	-0.439429	4.46842	-4.15156	8.62382e-05	0.00317203	1.27544
MIR548W	-0.352165	8.03248	-4.15014	8.66746e-05	0.00318343	1.27077
MIR644A	-0.667672	6.51355	-4.14926	8.69471e-05	0.00318878	1.26787
MXRA7	0.466328	7.02291	4.14835	8.72281e-05	0.0031935	1.26489
ONECUT1	-1.15248	8.2283	-4.14802	8.73296e-05	0.0031935	1.26381
ACVRL1	0.206779	5.0392	4.14755	8.74773e-05	0.00319425	1.26225
LSAMP	0.517281	4.04063	4.14682	8.7704e-05	0.00319789	1.25986
PDE10A	0.605024	4.03919	4.14566	8.80643e-05	0.00320638	1.25607
PEX19	-0.351178	6.0036	-4.14516	8.82227e-05	0.00320751	1.25441
C11orf63	0.383349	3.89763	4.14442	8.84531e-05	0.00321125	1.25199
DLL4	0.224722	4.6162	4.1431	8.88697e-05	0.00322172	1.24765
EDIL3	0.87409	4.94279	4.14175	8.9294e-05	0.00323244	1.24325
VAT1	0.335881	5.85314	4.1409	8.95654e-05	0.00323761	1.24044
TBX2	0.233266	4.62329	4.14007	8.98289e-05	0.00323974	1.23773
PML	0.197768	4.96859	4.13985	8.99001e-05	0.00323974	1.23699
FAM129A	0.650866	4.31977	4.13943	9.00339e-05	0.00323974	1.23562
MIR548A2	-0.313941	5.38601	-4.1391	9.01393e-05	0.00323974	1.23454
ANKRD18A	-0.5371	4.46795	-4.13783	9.05446e-05	0.00324966	1.23039
CRYM	-0.364146	4.58249	-4.13557	9.12728e-05	0.00327086	1.22299
TSPAN1	1.22154	5.16872	4.13519	9.13954e-05	0.00327086	1.22175
AP2B1	0.352277	7.59494	4.13476	9.15352e-05	0.00327121	1.22033
CD151	0.441266	7.99389	4.13422	9.17119e-05	0.00327288	1.21855
MIR1285-1	-0.259501	7.18616	-4.1315	9.25987e-05	0.00329985	1.20966
SNORA72	-0.410997	3.58265	-4.13097	9.2772e-05	0.00330135	1.20793
TBX5	0.123539	3.04892	4.13035	9.29762e-05	0.00330394	1.2059
AGXT2L2	-0.203781	4.74991	-4.12977	9.31694e-05	0.00330614	1.20398
ANKRD26	-0.286607	4.21853	-4.12784	9.38053e-05	0.00330982	1.19769
CASC2	-0.222886	3.31959	-4.12711	9.40484e-05	0.00330982	1.1953
SERPINF2	-0.604977	5.33468	-4.12687	9.41286e-05	0.00330982	1.19451
TRMT10B	-0.273167	5.19627	-4.12643	9.42767e-05	0.00330982	1.19306
EFS	0.180692	4.58081	4.12632	9.43143e-05	0.00330982	1.19269
KIRREL	0.415362	5.62598	4.12619	9.43577e-05	0.00330982	1.19227
CRIP2	0.235681	5.70385	4.12615	9.43688e-05	0.00330982	1.19216
REEP4	0.188217	5.28817	4.12596	9.44322e-05	0.00330982	1.19154
PYCR1	0.210429	5.28649	4.12589	9.44572e-05	0.00330982	1.19129
PUSL1	0.146423	5.27347	4.12299	9.54326e-05	0.00333934	1.1818
VEGFC	0.46123	4.34087	4.11991	9.64757e-05	0.00337116	1.17175
TMEM56	-0.491958	5.22403	-4.11875	9.6874e-05	0.00338038	1.16795
HADHB	-0.294209	6.75597	-4.11763	9.72569e-05	0.00338904	1.1643
NANOG	-0.383678	3.26028	-4.11695	9.74921e-05	0.00338917	1.16207
ADCK3	-0.170891	5.5244	-4.11654	9.7634e-05	0.00338917	1.16073
LAMP5	0.746344	4.32097	4.11645	9.76646e-05	0.00338917	1.16044
CDKN1C	0.259623	5.13149	4.11603	9.7809e-05	0.0033895	1.15907
DMGDH	-0.638986	4.08481	-4.11525	9.80784e-05	0.00339416	1.15653
LOC100130776	0.39851	4.70945	4.1138	9.85841e-05	0.00340697	1.15178
RN5S307	-0.766686	3.34401	-4.11239	9.90742e-05	0.00341921	1.1472
IER5L	0.367775	4.80385	4.11156	9.93679e-05	0.00342465	1.14446
KCNK6	0.187933	5.4653	4.10926	0.000100178	0.00344787	1.13695
HOGA1	-0.382813	4.38373	-4.10879	0.000100344	0.00344838	1.13543
HMGCS2	-1.37524	4.53997	-4.10844	0.000100468	0.00344838	1.13429
ARPC4	0.234441	6.82545	4.1075	0.000100801	0.00345512	1.13123
VAMP3	0.25236	7.77944	4.1071	0.000100945	0.00345535	1.12991
MYADML	0.16961	3.64941	4.10595	0.000101356	0.00346471	1.12616
YWHAZP3	0.357694	9.72519	4.10482	0.000101761	0.00347111	1.12248
HRAS	0.181762	6.37453	4.10465	0.00010182	0.00347111	1.12194
HMGA2	0.73825	3.78404	4.10171	0.000102882	0.0035026	1.11235
ARNT	-0.341642	6.51457	-4.10099	0.000103145	0.00350679	1.11
BSN-AS2	0.15105	3.16154	4.10036	0.000103375	0.00350988	1.10794
CTHRC1	0.552908	5.9575	4.09947	0.000103698	0.00351608	1.10506
BTBD6	0.144384	6.02865	4.09839	0.000104094	0.00352476	1.10154
SIRT5	-0.279608	5.7523	-4.098	0.000104237	0.00352485	1.10027
LOC728613	-0.43872	5.74421	-4.09553	0.00010515	0.00355097	1.09221
MIR548AN	-0.28467	7.72198	-4.09508	0.000105317	0.00355183	1.09075
ARL10	0.112214	4.77592	4.09274	0.000106189	0.00357524	1.08313
RNU7-24P	-0.402131	6.34229	-4.09246	0.000106295	0.00357524	1.08221
DBN1	0.277177	5.86658	4.09153	0.000106642	0.00358211	1.0792
TIMM23B	-0.198793	6.72909	-4.09053	0.000107018	0.00358996	1.07595
TMEM87B	0.372912	5.79306	4.08947	0.000107421	0.00359239	1.07248
BLNK	-0.740059	5.89465	-4.08927	0.000107495	0.00359239	1.07185
RABAC1	0.312498	8.73696	4.08921	0.000107519	0.00359239	1.07164
TSR3	0.189323	6.37988	4.08803	0.000107967	0.0035972	1.0678
GPR157	0.129166	5.32944	4.08744	0.00010819	0.0035972	1.06589
GXYLT2	0.497447	4.31418	4.08731	0.000108242	0.0035972	1.06545
PFKFB4	0.1869	4.12576	4.0872	0.00010828	0.0035972	1.06512
ADAMTS6	0.341785	3.10064	4.08679	0.000108436	0.0035972	1.06379
EFNB2	0.593821	5.3297	4.08625	0.000108645	0.0035972	1.06202
PSMD13	0.330543	6.48476	4.08603	0.000108728	0.0035972	1.06131
COL15A1	0.488174	5.53546	4.08583	0.000108807	0.0035972	1.06064
HRH1	0.239771	3.78852	4.08491	0.000109158	0.00360099	1.05766
TMED3	0.296138	4.76662	4.08478	0.000109208	0.00360099	1.05725
TPBG	0.267113	4.4	4.0815	0.000110477	0.00363339	1.04658
PDZK1P1	-0.925982	6.05475	-4.08149	0.000110479	0.00363339	1.04656
RN5S312	-1.00516	6.71234	-4.0796	0.000111216	0.00364334	1.04042
RN5S313	-1.00516	6.71234	-4.0796	0.000111216	0.00364334	1.04042
RN5S315	-1.00516	6.71234	-4.0796	0.000111216	0.00364334	1.04042
BRP44	-0.46583	6.96188	-4.07888	0.000111497	0.00364765	1.03809
ACSM2A	-1.1339	4.32903	-4.07813	0.000111793	0.00364765	1.03564
MIR1299	-0.521547	8.27768	-4.07795	0.000111866	0.00364765	1.03504
LHFPL2	0.262209	4.75598	4.07727	0.000112131	0.00364765	1.03285
CYB5R2	0.376177	4.82232	4.07713	0.000112186	0.00364765	1.0324
ALDH1L1	-0.399119	4.31682	-4.07672	0.000112351	0.00364765	1.03105
PMP22	0.688137	6.90011	4.07669	0.000112362	0.00364765	1.03095
ALKBH5	0.21176	6.04092	4.07606	0.00011261	0.00365098	1.02892
PACS1	0.340461	6.45929	4.07549	0.000112837	0.00365363	1.02706
SAMD9	0.813449	5.11462	4.07424	0.000113333	0.00365822	1.02301
GALNT10	0.320793	5.04273	4.0737	0.00011355	0.00365822	1.02124
ARMC9	0.316288	4.64041	4.07359	0.000113594	0.00365822	1.02089
ZNF703	0.297767	5.96548	4.07356	0.000113606	0.00365822	1.02079
PPP1R3D	0.269654	3.52639	4.07328	0.000113716	0.00365822	1.01989
PEBP1	-0.367828	8.96406	-4.07271	0.000113944	0.00365822	1.01805
LINC00266-4P	-0.193421	6.40316	-4.07258	0.000113997	0.00365822	1.01762
ACTR3B	-0.266104	5.58315	-4.07112	0.000114583	0.00367234	1.01288
LYPLA2	0.286739	6.09238	4.06929	0.000115324	0.00369139	1.00693
MOB2	0.12196	4.49916	4.06886	0.000115497	0.00369225	1.00555
SAMD4A	0.208171	4.62351	4.06777	0.000115938	0.00370162	1.00203
TMED9	0.283184	6.28788	4.06737	0.000116101	0.00370214	1.00073
HDHD2	-0.42212	6.28318	-4.0664	0.000116498	0.00370552	0.997584
AKT1	0.18072	5.66483	4.06639	0.000116502	0.00370552	0.997555
F10-AS1	-0.212336	5.41668	-4.066	0.000116662	0.00370594	0.996282
SLC17A4	-1.21067	5.69879	-4.06417	0.000117416	0.00372518	0.990338
TRAF7	0.264311	5.6185	4.06377	0.000117579	0.00372566	0.989055
CARD6	0.459156	4.1509	4.06307	0.00011787	0.0037279	0.986772
MIR587	-0.647625	4.37933	-4.06288	0.000117946	0.0037279	0.986179
NMT2	-0.355766	5.09243	-4.06111	0.00011868	0.0037464	0.980452
LY6G5B	-0.231345	4.99598	-4.0605	0.000118937	0.00374979	0.978459
KLF15	-0.244728	5.15144	-4.06007	0.000119115	0.00375071	0.977076
LHX4	-0.20032	4.30306	-4.0577	0.000120112	0.00377738	0.969382
MUT	-0.431505	6.49015	-4.05651	0.000120615	0.00378844	0.965531
GRAMD1A	0.261853	5.67914	4.05601	0.000120826	0.00379034	0.963916
C14orf37	0.331725	4.09462	4.05545	0.000121063	0.00379263	0.962102
SNORA70F	-0.333894	3.59996	-4.05513	0.0001212	0.00379263	0.961061
GOT1	-0.536119	6.42096	-4.05364	0.000121833	0.0038077	0.956253
DIO2	0.160778	2.8262	4.05285	0.000122173	0.00381358	0.953683
LASP1	0.245695	7.47594	4.05081	0.000123047	0.0038361	0.947106
MAT1A	-0.97175	4.73243	-4.05035	0.000123247	0.00383757	0.945609
LOC100506032	-0.352347	9.06019	-4.04988	0.000123448	0.00383911	0.944098
PAIP2B	-0.585754	4.01067	-4.04848	0.000124056	0.00384906	0.939568
DMXL1	-0.309727	5.41804	-4.04844	0.000124074	0.00384906	0.939431
LOC407835	0.156846	4.56444	4.04617	0.000125064	0.00387218	0.932104
MARVELD1	0.467349	5.59157	4.04603	0.000125127	0.00387218	0.931633
CLIC1	0.274649	8.03976	4.0451	0.000125534	0.00387999	0.92864
SYNJ2	0.26094	4.59643	4.04454	0.000125782	0.00388287	0.926821
OSBPL5	0.121628	5.32515	4.04189	0.000126953	0.00391424	0.918266
LRP1	0.482551	6.49331	4.03988	0.000127849	0.00393702	0.911781
LINC00602	0.181543	3.43368	4.03915	0.000128176	0.00394227	0.909424
MPZL2	0.503353	6.24049	4.03871	0.000128372	0.00394348	0.908012
CYP3A4	-1.32675	4.82252	-4.03773	0.000128814	0.00395028	0.904841
NFS1	-0.191018	5.65443	-4.0371	0.000129097	0.00395028	0.90282
RUNX1	0.299623	4.95288	4.03695	0.000129168	0.00395028	0.902312
C4orf48	0.472685	6.45519	4.03683	0.000129221	0.00395028	0.90193
LINC00353	-0.213892	3.37271	-4.03606	0.000129568	0.00395606	0.89946
ZNF700	-0.236492	6.73232	-4.03508	0.000130013	0.00396483	0.896297
SDHC	-0.314499	7.06047	-4.03421	0.00013041	0.00397213	0.893483
POGZ	-0.388941	6.79263	-4.03369	0.000130646	0.00397451	0.891815
FAM35B	-0.37253	4.83298	-4.03212	0.000131364	0.00399152	0.886761
RAC2	0.434936	6.28247	4.02994	0.00013237	0.00401724	0.879723
NOD2	0.15335	3.68887	4.02919	0.000132718	0.00402297	0.877296
C2orf81	0.147876	4.49493	4.02862	0.000132982	0.00402475	0.875463
TXLNA	0.307264	6.5044	4.02837	0.000133097	0.00402475	0.874667
EIF3I	0.312159	7.08911	4.02737	0.000133564	0.00403401	0.87144
SH3D21	0.271108	5.17305	4.02621	0.000134104	0.00404548	0.867714
RNH1	0.18791	5.9874	4.02585	0.000134275	0.00404577	0.866542
LRRC37A2	-0.379759	6.57413	-4.02522	0.000134569	0.00404877	0.864524
EPHA2	0.313008	5.52187	4.02495	0.000134696	0.00404877	0.863651
TACSTD2	0.412427	3.69262	4.02411	0.000135093	0.00405586	0.860938
ARHGDIA	0.287609	6.40514	4.0223	0.000135951	0.00407674	0.8551
LOC219731	-0.22897	3.59836	-4.02173	0.000136222	0.00407901	0.853262
SDHAP1	-0.349768	6.93605	-4.02133	0.00013641	0.00407901	0.851992
RNU6-38	-0.395841	6.65774	-4.02112	0.000136513	0.00407901	0.851295
XPNPEP3	-0.200397	5.79308	-4.01924	0.000137411	0.00409853	0.84525
RASD2	0.18262	4.17805	4.01907	0.000137492	0.00409853	0.844706
WNT7B	0.208425	4.19957	4.01702	0.000138479	0.00412308	0.838106
SMAD7	0.258581	4.5573	4.01501	0.000139454	0.00414397	0.831641
GFM2	-0.276464	5.11073	-4.01484	0.000139535	0.00414397	0.831101
CDKN2B	0.394942	4.72057	4.01455	0.000139675	0.00414397	0.830176
LOC100506060	-0.399396	6.79032	-4.01294	0.000140462	0.00416242	0.824994
GNB2	0.179975	6.22087	4.0103	0.000141761	0.00419595	0.81651
PRR5L	0.240914	4.17882	4.00808	0.00014286	0.00421093	0.809389
ST6GALNAC4	0.193352	4.87385	4.00777	0.000143018	0.00421093	0.808371
PANX1	0.410898	6.19377	4.00769	0.000143058	0.00421093	0.80811
HLF	-0.769713	5.73718	-4.00765	0.000143076	0.00421093	0.807991
UNC5C	0.367866	3.44157	4.00751	0.000143148	0.00421093	0.807531
JUNB	0.478418	7.33436	4.00726	0.000143271	0.00421093	0.806737
LINC00481	-0.198478	6.72747	-4.005	0.000144403	0.00423843	0.799484
SNORD92	-0.751102	4.65437	-4.00397	0.000144919	0.00423843	0.796195
TBX18	0.205953	3.58192	4.00381	0.000145004	0.00423843	0.795654
GPLD1	-0.420097	3.51032	-4.00372	0.000145047	0.00423843	0.795379
CLIC4	0.51181	6.70476	4.00372	0.000145049	0.00423843	0.795366
NUDT7	-0.330093	5.0269	-4.00291	0.000145457	0.00424543	0.792775
SAMD8	0.199669	5.05152	4.00151	0.00014617	0.00426128	0.788271
FAM115A	0.207282	5.57428	4.00053	0.000146667	0.00427084	0.785138
GADD45GIP1	0.229135	6.20733	3.99919	0.000147354	0.00428587	0.780833
RN5S166	-0.370121	5.92262	-3.99798	0.000147972	0.00429444	0.776973
ZNF853	0.141832	4.24979	3.99795	0.00014799	0.00429444	0.776863
EPHX1	-0.571043	6.6893	-3.99619	0.000148899	0.00431585	0.771216
LAMB3	0.720488	5.29645	3.99283	0.000150649	0.00435932	0.760448
ALDOA	0.254775	6.40555	3.99228	0.000150938	0.00435932	0.758681
KPNA6	0.311873	6.04742	3.99226	0.000150947	0.00435932	0.758623
SLC23A1	-0.50041	5.48671	-3.99198	0.000151092	0.00435932	0.75774
SPEF2	-0.392482	3.16788	-3.98984	0.000152221	0.00438462	0.750876
P4HA3	0.142604	3.55614	3.98966	0.000152317	0.00438462	0.750295
MIR548G	-0.147235	6.20741	-3.98785	0.000153281	0.00440731	0.744483
PODNL1	0.187555	4.93129	3.98699	0.000153737	0.00441537	0.741746
MIR548H2	-0.311017	7.73978	-3.98443	0.000155109	0.0044497	0.733557
MIR548H3	-0.287574	7.32666	-3.98176	0.000156552	0.00448331	0.725022
ANXA1	0.993453	5.93808	3.98126	0.000156828	0.00448331	0.7234
RNU7-34P	-0.260742	2.80849	-3.98109	0.000156917	0.00448331	0.722879
MST1P2	-0.388719	5.46708	-3.98095	0.000156993	0.00448331	0.722429
CNNM2	0.288844	4.83332	3.97775	0.000158751	0.00452527	0.712169
RNU7-53P	-0.458164	6.30241	-3.97762	0.000158823	0.00452527	0.711754
LOC100287049	-0.262089	4.30532	-3.97503	0.000160251	0.00455815	0.703504
SF3B2	0.20314	6.8669	3.97488	0.000160339	0.00455815	0.703
GDF10	0.115182	3.92443	3.9724	0.00016172	0.00459224	0.695094
SETDB1	-0.394731	5.13352	-3.96831	0.000164032	0.00465262	0.68202
C10orf11	-0.270339	4.86901	-3.96788	0.000164275	0.00465426	0.680657
MAP3K6	0.143663	4.72501	3.96467	0.000166113	0.00470106	0.670403
CORO2B	0.421579	3.89708	3.96308	0.000167027	0.00471628	0.665352
LOC100506258	-0.122074	4.51992	-3.96305	0.000167045	0.00471628	0.665251
RN5S320	-0.704473	5.0341	-3.96276	0.000167213	0.00471628	0.664323
SMURF2	0.426844	6.25301	3.96185	0.00016774	0.00472584	0.661424
MIR548AJ2	-0.213493	6.65122	-3.96135	0.000168032	0.0047287	0.659823
IFI6	0.877594	7.44411	3.96103	0.000168218	0.0047287	0.658806
LINC00174	-0.267127	5.232	-3.96035	0.000168617	0.00473464	0.656621
LOC100128675	-0.13633	5.449	-3.95979	0.000168942	0.00473657	0.654849
LOC100506290	-0.2	9.90493	-3.95958	0.000169062	0.00473657	0.654192
RHOBTB2	0.121641	4.34705	3.95923	0.000169268	0.00473705	0.653074
PPP2R2D	-0.26668	4.77837	-3.95867	0.000169599	0.00474105	0.651273
COL16A1	0.150161	5.09391	3.9572	0.000170464	0.00475497	0.646589
BCL2A1	0.60661	3.67142	3.95718	0.000170475	0.00475497	0.646528
SLC43A1	-0.523171	6.27416	-3.95614	0.000171091	0.00476685	0.643208
TPI1	0.285216	6.79541	3.95566	0.000171372	0.00476778	0.641696
B3GNT9	0.234943	4.44572	3.95544	0.000171503	0.00476778	0.640991
ALDH3A2	-0.527504	6.23041	-3.95439	0.000172125	0.0047798	0.637656
TRAPPC3	0.263011	6.41462	3.95381	0.000172473	0.00478419	0.635795
LAMC2	0.995635	6.85293	3.95324	0.000172815	0.00478838	0.633972
LRRC32	0.503374	5.88752	3.95205	0.000173525	0.00480009	0.630198
ECHS1	-0.373772	6.82598	-3.95181	0.00017367	0.00480009	0.629428
CCDC109B	0.416457	4.96059	3.95158	0.00017381	0.00480009	0.628686
HMX3	0.198503	5.04064	3.95039	0.000174523	0.00481449	0.624916
FLII	0.24777	6.10376	3.949	0.000175366	0.00483245	0.620478
DDOST	0.222678	6.41747	3.94787	0.000176049	0.00484596	0.6169
GLT8D2	0.575538	4.139	3.94671	0.000176754	0.00485636	0.613218
LRRC37A3	-0.28686	6.51127	-3.94662	0.000176813	0.00485636	0.612912
AZGP1P1	-0.268903	4.0869	-3.94579	0.00017732	0.00486499	0.610273
EHBP1L1	0.183033	5.35879	3.94515	0.000177713	0.00487045	0.608236
DES	0.294635	4.11537	3.94426	0.000178261	0.0048761	0.605398
VASH1	0.204164	5.09316	3.94418	0.000178306	0.0048761	0.605165
CPB2-AS1	-0.599868	3.83837	-3.94211	0.000179585	0.00490276	0.598584
TIMP1	0.277472	7.32542	3.94197	0.000179671	0.00490276	0.598145
HBEGF	0.418173	4.95602	3.93901	0.000181516	0.00494775	0.588737
PLEKHN1	0.133991	5.10596	3.9385	0.000181837	0.00495112	0.587113
CREB3L1	0.389545	4.62047	3.93667	0.000182991	0.00497715	0.581289
ID3	0.417877	4.33206	3.93468	0.00018425	0.005006	0.574973
ECM1	0.41969	5.25439	3.93434	0.000184465	0.00500642	0.573902
LRRC37A	-0.346869	6.47679	-3.93211	0.000185889	0.00503462	0.56682
NHS	0.370448	4.07545	3.93192	0.000186009	0.00503462	0.566229
SLC11A1	0.305393	5.43584	3.93178	0.000186104	0.00503462	0.565757
CHST14	0.196008	5.58291	3.93045	0.000186958	0.00504726	0.561543
COTL1	0.548437	6.72334	3.93039	0.000186995	0.00504726	0.561362
COX6C	-0.202892	5.3735	-3.93011	0.000187173	0.00504726	0.560485
ALDH6A1	-0.597316	5.03762	-3.92944	0.000187611	0.00505136	0.558335
MIR548AL	-0.180968	4.59171	-3.92921	0.000187754	0.00505136	0.557632
SLC35F2	0.32673	4.27813	3.92895	0.000187928	0.00505136	0.556783
GPNMB	0.569479	6.06228	3.92787	0.000188624	0.00506468	0.553375
TMEM47	0.619521	5.67301	3.9275	0.000188865	0.00506573	0.552203
LOC645949	-0.179869	3.27718	-3.92686	0.000189284	0.00507157	0.550161
C2orf27A	0.431025	4.12699	3.92579	0.000189982	0.00508484	0.546776
BICD2	0.202114	4.99198	3.92542	0.000190227	0.005086	0.545588
AVEN	0.261053	4.7857	3.92431	0.000190952	0.00509995	0.542088
CDK5R1	0.199469	4.87248	3.92328	0.000191633	0.00510386	0.538808
CALR	0.238684	10.531	3.92313	0.000191731	0.00510386	0.538338
RHOC	0.190066	6.43489	3.92245	0.000192178	0.00510386	0.536194
CSPP1	-0.855496	6.70309	-3.9224	0.000192215	0.00510386	0.536019
RBM15B	0.185068	6.38136	3.92219	0.00019235	0.00510386	0.535373
CHSY1	0.427458	6.03284	3.92179	0.000192617	0.00510386	0.534094
TAB3-AS1	-0.320806	7.09212	-3.92161	0.000192738	0.00510386	0.533518
THBS1	0.742651	7.7472	3.92142	0.000192865	0.00510386	0.532914
COLEC12	0.729304	4.23971	3.92133	0.000192924	0.00510386	0.532631
GJD3	0.253776	3.89234	3.91974	0.00019398	0.00512289	0.527605
TM2D2	0.279061	5.29771	3.91883	0.000194587	0.00512289	0.524733
RN5S311	-0.927597	6.75339	-3.91872	0.000194661	0.00512289	0.52438
RN5S314	-0.927597	6.75339	-3.91872	0.000194661	0.00512289	0.52438
RN5S317	-0.927597	6.75339	-3.91872	0.000194661	0.00512289	0.52438
GNA11	0.234994	6.0829	3.91805	0.00019511	0.00512663	0.522261
QRICH2	-0.139666	4.81953	-3.91781	0.000195275	0.00512663	0.521485
PRKCD	0.253846	5.73575	3.9176	0.000195415	0.00512663	0.520826
P4HA1	0.635888	6.32776	3.91583	0.000196606	0.0051514	0.515231
EPHB2	0.434288	5.26993	3.91559	0.000196768	0.0051514	0.514473
DRD5	0.139325	5.02275	3.91521	0.000197027	0.00515282	0.513262
MIR548AA2	-0.299071	7.84774	-3.91405	0.000197812	0.00516576	0.509607
ZNF44	-0.268713	4.60614	-3.91388	0.000197933	0.00516576	0.509043
UBE2J2	0.130796	5.07378	3.91279	0.000198671	0.00517965	0.505617
MIR548AK	-0.270041	7.69914	-3.91125	0.000199729	0.00520184	0.500731
PXN	0.255416	5.79634	3.90978	0.000200742	0.00522281	0.496077
FCGR3A	0.647049	5.79969	3.90903	0.000201255	0.00523075	0.493728
PLA2G12B	-0.684478	3.79927	-3.90738	0.000202399	0.00524045	0.488514
CPZ	0.212853	4.99105	3.90708	0.000202609	0.00524045	0.487556
PGM2L1	0.619498	5.00149	3.90694	0.000202708	0.00524045	0.48711
ZNF638	-0.212694	6.18028	-3.90676	0.000202832	0.00524045	0.486547
RN5S310	-0.88165	6.46458	-3.9067	0.000202878	0.00524045	0.486339
RN5S316	-0.88165	6.46458	-3.9067	0.000202878	0.00524045	0.486339
UBE2S	0.220369	5.18075	3.9063	0.000203151	0.00524213	0.4851
SOGA3	0.303638	3.12377	3.90532	0.000203837	0.00525445	0.481996
LOC100506870	-0.506788	3.99099	-3.90325	0.000205292	0.00527332	0.475455
ALS2CR8	-0.300544	4.48383	-3.90309	0.000205407	0.00527332	0.474941
RBP2	-0.27538	3.83731	-3.90307	0.00020542	0.00527332	0.474879
CD68	0.589041	8.52639	3.90304	0.000205438	0.00527332	0.474801
ANPEP	-0.869724	8.09463	-3.90279	0.000205617	0.00527332	0.473998
TEFM	-0.296812	4.45027	-3.90173	0.000206364	0.0052857	0.470664
PECR	-0.457707	5.43825	-3.90133	0.000206653	0.0052857	0.469378
LINC00410	-0.175545	5.91332	-3.90098	0.000206895	0.0052857	0.468297
KIAA0100	0.386918	6.68164	3.90089	0.000206961	0.0052857	0.468007
TRIM36	0.184478	3.43954	3.90062	0.00020715	0.0052857	0.467164
BEND7	-0.500945	4.27123	-3.89938	0.000208037	0.00530293	0.463237
EMP3	0.827826	6.62983	3.89704	0.00020971	0.00533824	0.455867
TOMM40	0.249607	6.28566	3.89686	0.000209846	0.00533824	0.45527
ANGPTL2	0.424358	5.64873	3.89591	0.000210525	0.0053501	0.4523
OSGEPL1	-0.265778	4.3258	-3.89497	0.000211208	0.00535898	0.449321
COL7A1	0.158002	4.87358	3.89484	0.0002113	0.00535898	0.448918
F2R	0.468499	7.25297	3.89355	0.000212238	0.00537735	0.444844
MIR3162	-0.371517	4.50307	-3.89081	0.00021424	0.00541716	0.436209
SHKBP1	0.206487	5.48666	3.88986	0.000214941	0.00542941	0.433207
ZKSCAN3	-0.19484	3.77385	-3.88924	0.000215397	0.0054322	0.431258
EXTL3	0.150771	4.53985	3.8888	0.000215719	0.0054322	0.429883
OXCT1	0.394199	3.75447	3.88861	0.000215863	0.0054322	0.429268
GLI3	0.441203	4.38788	3.88854	0.000215915	0.0054322	0.429049
AHR	0.552068	7.77653	3.88738	0.000216773	0.00544835	0.4254
PANK4	0.140984	4.7833	3.88637	0.000217524	0.00546026	0.422222
C2orf72	-0.484528	5.69225	-3.88616	0.000217681	0.00546026	0.421556
MIR4295	-0.408213	2.93601	-3.88426	0.000219102	0.00549042	0.415574
MIR484	0.203256	5.16202	3.88262	0.000220336	0.00551585	0.410409
PJA1	0.29575	4.67099	3.88031	0.000222082	0.00555403	0.403152
CPEB3	-0.259919	3.79893	-3.87975	0.000222511	0.00555923	0.401377
PELI2	0.477836	4.66794	3.87833	0.000223592	0.00557822	0.396921
CYP2C8	-1.40968	4.91538	-3.87815	0.000223732	0.00557822	0.396346
YWHAH	0.204578	6.67387	3.87788	0.000223936	0.00557822	0.395507
SLC37A2	0.204498	4.5943	3.87598	0.000225399	0.00560911	0.38952
WISP1	0.408512	4.92919	3.87485	0.000226271	0.00562391	0.385969
TRHDE-AS1	0.305402	4.11334	3.87463	0.000226441	0.00562391	0.38528
MLLT11	0.479268	4.67018	3.8739	0.000227008	0.0056322	0.38298
ERO1L	0.799898	7.45359	3.87362	0.000227222	0.0056322	0.382113
ARSJ	0.556023	4.49303	3.87248	0.000228107	0.00564857	0.378539
RC3H1-IT1	-0.262241	4.30611	-3.87189	0.000228566	0.00565438	0.37669
SLC30A10	-0.481324	3.9968	-3.87126	0.000229064	0.00566112	0.374691
C10orf62	-0.176236	4.70091	-3.87006	0.000230005	0.00567881	0.37092
SH3GL1	0.1779	6.16888	3.86931	0.00023059	0.00567883	0.368586
MIR1285-2	-0.271215	9.3266	-3.86903	0.000230815	0.00567883	0.367691
ERVK13-1	-0.262716	4.60434	-3.86898	0.000230853	0.00567883	0.367538
PLA2G15	0.132083	5.07968	3.86891	0.000230909	0.00567883	0.367315
WFS1	0.180098	4.82215	3.86783	0.000231764	0.00569125	0.363919
MFAP5	0.705298	3.13802	3.86746	0.000232055	0.00569125	0.362763
FNDC1	0.825414	4.87404	3.86741	0.000232093	0.00569125	0.362614
GUSBP11	-0.239953	5.20558	-3.8659	0.000233297	0.00571521	0.357857
EXT2	0.267991	5.65922	3.86485	0.000234136	0.00573017	0.35456
ITPKB	0.207057	3.96221	3.86325	0.000235413	0.00575583	0.349559
GATAD2A	0.151033	6.04206	3.86231	0.000236173	0.00576881	0.346597
ADAM8	0.146656	5.32868	3.85972	0.000238266	0.0058143	0.338485
WNT2	0.147887	3.54967	3.85862	0.000239167	0.00583062	0.335018
NDUFS2	-0.278145	6.96067	-3.85802	0.000239651	0.00583204	0.333162
PAQR4	0.156069	5.24291	3.85798	0.000239689	0.00583204	0.333015
ALAD	-0.295343	5.11572	-3.85623	0.000241117	0.00586113	0.327555
CDC37	0.254911	7.3278	3.85577	0.0002415	0.00586167	0.326095
2024-09-09	0.209381	6.05617	3.85564	0.000241606	0.00586167	0.325695
PRKG1	0.482815	3.98634	3.85196	0.000244655	0.00591954	0.31417
SLC38A5	0.253869	4.31438	3.85191	0.000244696	0.00591954	0.314013
GRHPR	-0.358507	5.80375	-3.84942	0.000246777	0.00596413	0.306234
GLTP	0.358843	6.65821	3.84809	0.000247903	0.00598108	0.302052
SHANK2-AS1	-0.434326	4.08969	-3.84803	0.000247954	0.00598108	0.301863
SCYL1	0.168944	6.03318	3.84746	0.00024843	0.00598683	0.300099
SIK3-IT1	-0.399743	4.31314	-3.84421	0.000251201	0.00604781	0.289909
JUP	0.360481	6.96192	3.84275	0.000252453	0.00607214	0.285341
TMEM45A	0.975578	4.77602	3.84213	0.000252978	0.00607232	0.283431
AP1B1	0.221313	5.86736	3.84203	0.000253064	0.00607232	0.283119
RNU6-83	-0.249895	3.2405	-3.84189	0.000253184	0.00607232	0.282683
PCLO	-0.461862	3.81458	-3.83577	0.000258517	0.00619156	0.263535
LYRM7	-0.28413	4.99562	-3.83562	0.000258648	0.00619156	0.263069
SLC2A14	0.365658	4.98483	3.83506	0.000259134	0.00619729	0.261345
GSN	0.203008	5.65648	3.83328	0.000260706	0.00622897	0.255789
PPP2R5A	-0.316518	5.63673	-3.83294	0.000261013	0.0062304	0.254708
MTMR2	0.231457	5.03675	3.83019	0.000263461	0.00627542	0.246135
SBNO2	0.136999	5.48285	3.82998	0.000263648	0.00627542	0.245483
OST4	0.224313	8.23688	3.8262	0.000267054	0.00635048	0.233695
LOXL3	0.0930744	4.16822	3.82581	0.000267409	0.00635292	0.232474
SACS	0.367016	4.26368	3.82499	0.000268156	0.00636332	0.229912
HS3ST3A1	0.300365	4.13679	3.82456	0.000268544	0.00636332	0.228584
TCN1	1.74881	4.30886	3.82449	0.000268605	0.00636332	0.228375
DYSF	0.219452	4.54133	3.82374	0.000269289	0.00637215	0.226041
ZDHHC11	-0.215899	4.40362	-3.82298	0.000269984	0.00637215	0.223674
PTP4A1	-0.466841	8.02208	-3.8228	0.000270154	0.00637215	0.223096
PKN1	0.206515	5.921	3.82267	0.000270272	0.00637215	0.222693
F3	0.792811	5.34138	3.82225	0.000270653	0.00637215	0.2214
RALB	0.217776	6.53588	3.82219	0.000270714	0.00637215	0.221194
GNMT	-0.483081	4.22929	-3.82215	0.000270751	0.00637215	0.221068
LRP10	0.335482	6.4403	3.82186	0.000271014	0.00637236	0.220179
MICALL1	0.169654	5.18364	3.82149	0.000271359	0.00637411	0.219009
PDGFC	0.688435	5.99418	3.82123	0.000271594	0.00637411	0.218213
NDUFAF6	-0.279699	4.48104	-3.82009	0.000272644	0.00639277	0.214672
PTTG1IP	0.248128	7.35563	3.81901	0.000273647	0.00640831	0.211301
PYGB	0.613057	5.88141	3.81872	0.000273916	0.00640831	0.210397
RAB11B-AS1	-0.29157	5.92718	-3.81856	0.00027407	0.00640831	0.20988
GMIP	0.168425	5.42527	3.81735	0.000275188	0.00642847	0.206143
MIR548T	-0.266733	7.01362	-3.81678	0.000275723	0.00643499	0.204359
MAN2B1	0.235193	6.24193	3.81538	0.000277036	0.00645963	0.2
PRICKLE2	0.246993	3.77765	3.81464	0.00027773	0.00646982	0.197702
VIM	0.449771	7.57107	3.8141	0.000278241	0.00647447	0.196012
AKAP12	0.550384	5.07548	3.81388	0.000278444	0.00647447	0.195343
JDP2	0.145528	4.98556	3.81196	0.000280268	0.00651085	0.189351
IMPA1	-0.326674	5.12953	-3.81053	0.00028163	0.00653255	0.1849
LOC100506990	-0.362617	5.61943	-3.81043	0.000281721	0.00653255	0.184603
YWHAG	0.268831	7.93223	3.80996	0.00028217	0.00653694	0.18314
RCC2	0.282182	6.9527	3.80817	0.00028388	0.00657051	0.177593
CYTH4	0.208112	4.75422	3.80768	0.000284353	0.00657057	0.176064
HIST1H2APS1	-0.738162	4.9403	-3.80763	0.000284405	0.00657057	0.175897
RN5S69	-0.264303	4.70663	-3.80596	0.000286016	0.00659714	0.170713
CBFB	0.317954	7.02929	3.80588	0.000286092	0.00659714	0.17047
MYD88	0.219232	5.50372	3.8049	0.000287044	0.00659714	0.167419
JPH2	0.14682	3.56506	3.80476	0.000287176	0.00659714	0.166999
LOC100507203	-0.574677	4.0328	-3.80468	0.000287255	0.00659714	0.166747
LPCAT1	0.444563	5.68378	3.80465	0.000287282	0.00659714	0.16666
KRT6B	1.04961	4.95238	3.80438	0.000287548	0.00659714	0.165809
DDX39B	-0.252277	6.67219	-3.80427	0.000287653	0.00659714	0.165474
MMP16	0.346028	3.09973	3.8037	0.000288209	0.00660388	0.163701
RNY4P7	-0.211256	4.16617	-3.80287	0.000289026	0.00661657	0.161103
BMP1	0.183672	5.03655	3.80241	0.000289468	0.00662066	0.159702
AP3M2	0.298144	4.78012	3.80166	0.000290207	0.00662939	0.157363
NBPF10	-0.338565	9.79457	-3.80142	0.000290438	0.00662939	0.156631
RASGRF2	0.624058	4.11224	3.80122	0.00029064	0.00662939	0.155992
LOC727896	-0.578239	4.4587	-3.79986	0.000291982	0.00665396	0.151765
HAAO	-0.279788	4.79466	-3.79784	0.000293975	0.00669332	0.145522
MAN1B1	0.166351	5.26416	3.79738	0.000294434	0.0066977	0.14409
PTPN23	0.146842	4.87295	3.79676	0.000295055	0.00670578	0.142155
TRNP1	0.439512	6.17506	3.79528	0.000296529	0.00672713	0.137582
LOC100507033	-0.390044	7.27893	-3.79452	0.000297297	0.00673817	0.13521
ARHGAP5-AS1	0.24464	4.98381	3.79409	0.000297731	0.00673817	0.133872
FAM118B	0.299847	4.82514	3.794	0.00029782	0.00673817	0.133598
DKFZp451B082	0.105955	2.78208	3.79314	0.00029868	0.00675156	0.130951
OAT	0.413044	4.10072	3.79194	0.0002999	0.0067683	0.127209
HN1	0.345133	5.71256	3.79188	0.000299958	0.0067683	0.127032
TSPAN17	0.211211	5.73267	3.78962	0.000302255	0.006814	0.120034
PTER	-0.475852	5.26697	-3.78915	0.000302734	0.00681871	0.118578
CIB1	0.37819	6.87758	3.78863	0.000303264	0.00682452	0.116976
SLC30A4	0.384904	3.76204	3.78814	0.000303766	0.00682972	0.115456
HLX	0.201969	4.04172	3.78774	0.00030418	0.00683291	0.114209
STK10	0.167979	5.16426	3.78609	0.000305876	0.00686488	0.109107
LOC100506305	-0.162164	3.81226	-3.78475	0.000307267	0.00688996	0.104943
RNU7-29P	-0.519492	6.21802	-3.78383	0.000308219	0.00690515	0.102105
MTERFD3	-0.226466	3.81643	-3.78334	0.000308728	0.00691039	0.100593
PLXND1	0.256512	5.74726	3.78277	0.000309326	0.00691763	0.0988165
TCF3	0.19462	6.26253	3.78105	0.000311118	0.00695153	0.0935159
LLGL1	0.131664	4.34659	3.77946	0.000312792	0.00698272	0.0885955
ZNF658B	-0.251149	3.29468	-3.77712	0.000315267	0.00703174	0.0813651
KLHDC9	-0.246678	4.69257	-3.77404	0.00031856	0.0070989	0.0718325
MIR645	-0.240404	3.94522	-3.77283	0.000319857	0.00712148	0.0681078
ACMSD	-0.812471	4.91413	-3.77106	0.000321774	0.00715782	0.062628
HECW1	0.154521	3.37814	3.77046	0.000322422	0.00716111	0.0607821
TP53INP1	-0.725385	7.45377	-3.7704	0.00032249	0.00716111	0.0605872
TARS2	-0.252626	5.36233	-3.77002	0.000322896	0.00716379	0.0594348
GALNT6	0.282797	4.36782	3.76886	0.000324158	0.00718545	0.0558571
POU5F1P4	-0.21273	4.00523	-3.76755	0.000325592	0.00721088	0.0518096
TRMT2B-AS1	-0.176555	4.8343	-3.76728	0.000325893	0.0072112	0.0509624
SCYL3	-0.328156	5.32722	-3.76592	0.000327381	0.00723543	0.0467845
NR1H4	-0.910482	5.10541	-3.76576	0.000327563	0.00723543	0.0462747
SEPP1	-0.555661	6.91587	-3.76422	0.000329265	0.00726101	0.0415216
MYO1G	0.170993	4.54857	3.76419	0.000329298	0.00726101	0.0414293
LEPREL1	0.389722	3.64135	3.76378	0.000329751	0.00726304	0.0401701
EMILIN2	0.214271	4.7659	3.76349	0.000330067	0.00726304	0.0392901
RAC1P2	0.256326	9.71104	3.76312	0.000330484	0.00726304	0.0381337
CCDC85B	0.14183	4.11211	3.76306	0.000330545	0.00726304	0.0379642
LOC100287765	-0.287015	4.67363	-3.76211	0.000331604	0.00727995	0.0350309
SLC17A1	-0.649848	3.92159	-3.76025	0.000333685	0.00731925	0.0292951
RN5S194	-0.362931	3.94265	-3.75907	0.000335009	0.0073419	0.0256631
HNRNPU-AS1	-0.50847	7.06805	-3.7587	0.000335429	0.00734447	0.0245143
EGR2	0.398363	4.70215	3.75845	0.000335711	0.00734447	0.0237459
ADH1A	-1.31866	4.43921	-3.75787	0.000336362	0.00735233	0.0219683
SHC4	0.25971	2.63801	3.75712	0.00033721	0.00736342	0.01966
NAP1L3	0.192348	4.10207	3.75691	0.000337455	0.00736342	0.0189954
YIPF2	0.296167	6.6925	3.75637	0.000338059	0.00736774	0.0173538
MIR718	0.199145	6.18763	3.75613	0.000338339	0.00736774	0.0165957
RGN	-0.671771	4.60641	-3.75596	0.000338531	0.00736774	0.0160745
PRAC	-0.147228	3.32605	-3.75504	0.000339578	0.00737975	0.0132442
GAPDH	0.2445	8.97932	3.75493	0.000339702	0.00737975	0.0129091
MIR548I4	-0.159017	6.22915	-3.7547	0.000339963	0.00737975	0.0122056
LOC100133315	-0.240185	4.20972	-3.75428	0.000340447	0.00738388	0.0109015
TKT	0.333761	5.99648	3.75319	0.000341686	0.00740405	0.00757075
CCNI	0.196371	7.40028	3.75295	0.000341966	0.00740405	0.00682153
AREG	1.21535	5.16872	3.75149	0.000343649	0.0074341	0.00232051
TSHZ3	0.31985	5.16459	3.75109	0.000344111	0.0074377	0.00108919
FLJ14186	-0.363056	5.77748	-3.75014	0.000345212	0.0074551	-0.00183984
FAM101B	0.306408	4.33189	3.74922	0.00034627	0.00747153	-0.00464438
LOC100499467	0.37196	4.19416	3.74683	0.000349059	0.00752526	-0.0119987
CD97	0.416795	6.97291	3.74592	0.000350129	0.0075371	-0.0148038
BHLHE41	0.54516	5.3921	3.74569	0.000350398	0.0075371	-0.0155072
SPDYE3	-0.462945	6.04236	-3.7456	0.000350507	0.0075371	-0.0157927
UQCRC2	-0.266823	7.27832	-3.74508	0.000351116	0.00754374	-0.017383
IKZF5	-0.373279	5.40909	-3.74472	0.000351535	0.00754631	-0.0184771
MDFI	0.253767	5.6178	3.74345	0.000353041	0.00757217	-0.022395
RALGAPA2	-0.366653	6.23059	-3.74279	0.000353816	0.00758234	-0.0244051
CTDNEP1	0.242779	6.80536	3.74101	0.000355943	0.00762141	-0.0298964
CSGALNACT2	0.340643	6.11726	3.73973	0.000357469	0.00764759	-0.0338189
LRRC4C	0.213713	2.94201	3.73947	0.000357781	0.00764776	-0.0346183
CRIP3	-0.377721	4.37823	-3.7374	0.000360267	0.00768529	-0.0409636
GTF3C1	0.208708	5.64681	3.73736	0.000360318	0.00768529	-0.0410926
APLN	0.271188	4.62358	3.73722	0.000360487	0.00768529	-0.0415233
ATP6V0D1	0.240989	6.31608	3.73692	0.000360851	0.00768529	-0.0424467
SYT11	0.528698	4.44514	3.73674	0.000361064	0.00768529	-0.0429886
ENSA	-0.32714	6.79861	-3.7363	0.000361601	0.00769021	-0.0443497
PCBP4	0.140754	4.71097	3.73589	0.000362099	0.0076943	-0.0456108
NRXN2	0.0916231	4.56441	3.7338	0.000364642	0.00773494	-0.0520225
MARCKSL1	0.265469	6.758	3.73359	0.000364886	0.00773494	-0.0526369
TSPO	0.258483	6.12792	3.73339	0.000365134	0.00773494	-0.0532603
CDCA4	0.195567	5.83877	3.73315	0.000365427	0.00773494	-0.0539944
HUNK	-0.75479	4.84904	-3.73305	0.000365549	0.00773494	-0.0543001
TNFSF11	0.355547	3.49871	3.73175	0.000367144	0.00776217	-0.0582895
KRT33B	0.112967	3.84634	3.73107	0.000367982	0.00777335	-0.0603776
MMP2	0.704551	6.16647	3.72893	0.000370625	0.0078226	-0.0669339
SNRNP35	-0.133949	6.08166	-3.72743	0.000372492	0.00785544	-0.0715397
ABCB9	0.124305	4.11291	3.72669	0.000373408	0.00786815	-0.073788
DKK3	0.31622	5.88203	3.72637	0.000373812	0.00787008	-0.0747798
CDH3	0.59315	4.30563	3.72612	0.000374127	0.00787012	-0.0755509
FLJ34208	-0.372298	4.25778	-3.72563	0.000374742	0.00787253	-0.0770559
KCNJ13	-0.341651	3.8996	-3.72553	0.000374868	0.00787253	-0.0773626
STRA6	0.202012	4.72976	3.72459	0.000376037	0.00788929	-0.0802156
TMEM54	0.426113	6.49581	3.72439	0.000376293	0.00788929	-0.0808381
MTMR10	-0.316535	5.1435	-3.7212	0.000380322	0.00796713	-0.0905953
SAV1	0.376088	5.95693	3.72008	0.000381753	0.00799046	-0.0940357
LOC100505828	-0.247418	6.97947	-3.71905	0.000383066	0.00800702	-0.0971803
ISL1	0.214443	3.25944	3.71896	0.000383181	0.00800702	-0.0974547
PEF1	0.168739	4.47678	3.71868	0.000383536	0.00800779	-0.0983033
RPSAP52	0.551799	4.24588	3.71745	0.000385119	0.00803418	-0.102077
PPP4C	0.285335	7.35313	3.71598	0.000387012	0.00806698	-0.106567
CPSF3L	0.13556	5.58399	3.71442	0.000389032	0.00810237	-0.111335
RNU7-57P	-0.379856	6.47008	-3.71363	0.000390057	0.008117	-0.113745
VSTM2L	0.181438	4.88526	3.70993	0.000394904	0.00821106	-0.125053
DEGS1	0.298755	6.75888	3.70965	0.000395277	0.00821204	-0.125919
CD300A	0.320683	5.06971	3.70863	0.000396614	0.00823302	-0.129011
MLLT10P1	-0.403878	3.73841	-3.70763	0.000397938	0.00824871	-0.132062
MIR4796	-0.833953	3.38303	-3.70757	0.000398026	0.00824871	-0.132265
FASTKD2	-0.190004	4.37889	-3.70697	0.000398822	0.0082584	-0.134093
TCTEX1D4	0.188728	3.63402	3.70611	0.000399959	0.00826849	-0.1367
NACC1	0.204368	5.75982	3.70611	0.000399966	0.00826849	-0.136718
PLBD2	0.220387	5.61715	3.70546	0.000400834	0.00827377	-0.138702
RNU7-10P	-0.646177	5.0825	-3.70542	0.00040088	0.00827377	-0.138806
KAZN	0.126847	4.4664	3.70421	0.000402503	0.0082861	-0.142506
MIR1256	-0.256811	4.11145	-3.70394	0.000402867	0.0082861	-0.143333
LOC401320	-0.29303	4.86778	-3.70387	0.00040296	0.0082861	-0.143546
SNX9	0.295125	6.83799	3.70372	0.000403158	0.0082861	-0.143994
RSU1	0.286283	7.13095	3.70338	0.000403613	0.0082861	-0.145027
ADH1B	-1.46912	5.45905	-3.70328	0.000403751	0.0082861	-0.14534
TMEM30A	0.319602	6.3979	3.70326	0.000403782	0.0082861	-0.145412
EIF4EBP1	0.205272	5.75419	3.70248	0.000404836	0.00830095	-0.147797
MARCKS	0.341553	8.43871	3.69964	0.000408672	0.0083706	-0.156432
ESYT3	-0.246543	3.65213	-3.69948	0.000408898	0.0083706	-0.156938
CTSD	0.360308	7.77916	3.69862	0.000410069	0.00838135	-0.159556
DENND3	0.238101	4.35212	3.6986	0.00041009	0.00838135	-0.159602
NBPF8	-0.323285	7.22493	-3.69815	0.000410711	0.00838242	-0.160988
WBP2NL	-0.184228	3.31386	-3.69755	0.000411522	0.00838242	-0.162793
LRP12	0.460613	4.26168	3.69723	0.000411963	0.00838242	-0.163774
FKSG29	-0.416639	3.96521	-3.69723	0.000411972	0.00838242	-0.163794
PSKH1	0.153719	6.46919	3.69715	0.00041208	0.00838242	-0.164034
FAM219A	0.228017	4.95232	3.69701	0.000412268	0.00838242	-0.164452
FCGR2C	0.614983	5.75539	3.69686	0.000412474	0.00838242	-0.164909
SLC24A3	0.486838	4.20994	3.69586	0.000413844	0.00840348	-0.167945
GATM	-0.537843	5.23118	-3.69447	0.000415765	0.00843566	-0.172183
MIR621	-0.343972	4.9258	-3.69418	0.000416171	0.0084371	-0.173076
TBC1D2	0.244323	4.72115	3.69337	0.000417291	0.00845301	-0.175538
FKBP9	0.259371	6.81044	3.6919	0.000419339	0.00848765	-0.180018
L3MBTL4	-0.443818	4.87783	-3.6913	0.000420172	0.00849768	-0.181835
PLIN5	-0.202054	5.64849	-3.69098	0.000420621	0.00849992	-0.182812
AMDHD1	-0.550381	4.13496	-3.68758	0.000425401	0.00858962	-0.193155
HSPB7	0.160796	4.33619	3.68672	0.000426616	0.00860724	-0.195764
PPP1R12B	-0.301197	4.79159	-3.68596	0.000427697	0.00861577	-0.198081
ETFDH	-0.387951	4.5844	-3.68558	0.000428239	0.00861577	-0.199239
SLC35E2B	0.150897	5.43343	3.68536	0.000428543	0.00861577	-0.199888
TBX20	0.196678	3.89529	3.68493	0.000429159	0.00861577	-0.201204
LOC284260	-0.127712	3.66967	-3.6844	0.000429914	0.00861577	-0.202812
WDR59	-0.272587	5.54024	-3.68436	0.000429974	0.00861577	-0.20294
OLFM4	1.45244	4.51006	3.68377	0.000430813	0.00861577	-0.204724
PGAM1	0.268119	6.63671	3.68362	0.000431031	0.00861577	-0.205187
PDLIM2	0.121022	5.29625	3.68354	0.000431143	0.00861577	-0.205424
ZNF429	-0.249817	6.01234	-3.68333	0.000431449	0.00861577	-0.206073
ADAM1	-0.347816	3.64636	-3.68322	0.000431605	0.00861577	-0.206405
DTD1	0.288788	6.05108	3.68311	0.000431769	0.00861577	-0.206751
LRP8	0.304523	4.69779	3.68297	0.000431968	0.00861577	-0.207172
HIST3H2BB	0.169678	4.68256	3.68288	0.000432089	0.00861577	-0.207429
SLC17A3	-0.678907	3.55722	-3.68282	0.000432175	0.00861577	-0.207612
GTDC1	0.200347	4.08955	3.68162	0.000433902	0.00864335	-0.211262
CLTC-IT1	-0.268046	5.84998	-3.68057	0.000435424	0.00866516	-0.214465
CRY2	-0.214428	4.80798	-3.68039	0.000435686	0.00866516	-0.215016
PKMYT1	0.161008	5.02069	3.68014	0.000436036	0.00866526	-0.21575
ATRN	-0.415057	6.53651	-3.6793	0.000437256	0.00868266	-0.218308
ACTR1A	0.270287	5.95224	3.67821	0.000438847	0.00870738	-0.221631
LIN7B	0.145519	5.77915	3.67768	0.000439616	0.00871577	-0.223233
PLA2G12A	-0.362958	5.57066	-3.67675	0.000440969	0.0087294	-0.226043
MIR145	0.304242	4.65566	3.67667	0.000441094	0.0087294	-0.226303
COL6A1	0.315612	5.68533	3.6765	0.000441345	0.0087294	-0.226823
NARF	0.211879	6.13516	3.6755	0.000442798	0.00873993	-0.229831
CACNB3	0.227144	4.85442	3.67532	0.000443076	0.00873993	-0.230404
CKLF	0.361122	7.38037	3.67508	0.000443425	0.00873993	-0.231126
MIR548J	-0.159075	2.48727	-3.67499	0.000443551	0.00873993	-0.231384
FOSL1	0.251216	4.48461	3.67488	0.000443716	0.00873993	-0.231724
KCNJ2	0.187223	3.64763	3.67471	0.000443962	0.00873993	-0.232232
SDHAP3	-0.34751	6.11409	-3.67404	0.00044495	0.00875023	-0.234266
STARD3	0.152389	5.7424	3.67389	0.000445181	0.00875023	-0.23474
TM4SF19	0.277187	3.79438	3.67345	0.000445822	0.00875142	-0.236057
GGN	0.133835	4.84021	3.67337	0.000445937	0.00875142	-0.236292
C3orf70	0.297724	4.06124	3.67304	0.000446435	0.00875399	-0.237314
FAM208B	-0.213317	5.9751	-3.6728	0.000446792	0.00875399	-0.238046
RNASEH2A	0.392253	5.63023	3.67258	0.000447111	0.00875399	-0.238699
PLTP	0.497661	6.37	3.66975	0.000451326	0.00882964	-0.247282
CRLF1	0.169399	4.556	3.66901	0.00045244	0.00883828	-0.249537
ALDH8A1	-0.533117	4.3242	-3.66899	0.000452471	0.00883828	-0.249599
LOC285501	-0.0959142	3.87693	-3.66866	0.000452955	0.00884089	-0.250578
C12orf5	0.316614	4.0044	3.66791	0.000454084	0.00885604	-0.252854
YKT6	0.235353	5.1912	3.666	0.000456973	0.00890548	-0.258655
PGAM1P5	-0.247458	5.08787	-3.66576	0.000457331	0.00890557	-0.259372
LRIT2	0.118337	3.39542	3.66129	0.000464144	0.00902714	-0.272896
MIR600	-0.195604	3.35881	-3.6612	0.000464292	0.00902714	-0.273187
ZNF138	-0.270827	5.13902	-3.66075	0.000464984	0.00903202	-0.274551
THPO	-0.411059	4.14243	-3.66053	0.000465316	0.00903202	-0.275202
ACTN3	0.096478	4.3799	3.66033	0.00046562	0.00903202	-0.2758
CD44	1.03471	7.09901	3.66007	0.000466031	0.00903302	-0.276606
ACACB	-0.389112	4.90751	-3.65912	0.000467495	0.00905262	-0.279476
HILPDA	0.450992	5.12685	3.65895	0.000467761	0.00905262	-0.279996
PFKL	0.159448	5.57796	3.6565	0.000471552	0.00911897	-0.287377
PROZ	-0.258329	4.15226	-3.65609	0.000472201	0.0091245	-0.288634
CPT2	-0.38476	4.61898	-3.6555	0.000473128	0.0091354	-0.290428
ARHGAP31	0.348087	4.54941	3.65264	0.000477619	0.00921299	-0.299066
HIBCH	-0.283104	5.17977	-3.65247	0.000477879	0.00921299	-0.299564
ITFG2	-0.241168	5.28764	-3.65178	0.000478976	0.00922473	-0.301661
CHPF	0.230223	5.22563	3.6515	0.000479417	0.00922473	-0.302501
MSRB3	0.418501	5.33945	3.65139	0.000479588	0.00922473	-0.302827
C12orf76	-0.206603	4.389	-3.65035	0.000481234	0.00924932	-0.30596
SPI1	0.274892	5.3377	3.65003	0.000481742	0.00925202	-0.306925
CKAP4	0.182182	6.17181	3.64834	0.000484448	0.00929689	-0.312046
SURF4	0.202614	6.08823	3.64731	0.000486095	0.00932138	-0.315148
RHOF	0.385819	5.0443	3.6469	0.000486749	0.00932682	-0.316378
RNU7-20P	-0.293497	5.25106	-3.64591	0.000488355	0.00935048	-0.31939
DDC	-0.295481	3.81284	-3.64475	0.000490224	0.00937913	-0.322882
DOM3Z	-0.164945	5.3876	-3.64418	0.000491141	0.00938647	-0.324589
KLHDC8B	0.128463	4.57907	3.64405	0.000491354	0.00938647	-0.324987
FAM171B	0.475039	4.14218	3.64349	0.00049227	0.00939683	-0.326688
C5orf62	0.292936	4.36022	3.64138	0.000495695	0.00945488	-0.333027
HSF1	0.191747	6.30119	3.64116	0.000496063	0.00945488	-0.333704
RNY4P25	-0.246748	4.59932	-3.63962	0.00049858	0.00949566	-0.33833
AGT	-0.82471	7.71595	-3.63849	0.000500444	0.00952395	-0.341741
BTBD18	-0.208016	2.83127	-3.63802	0.00050123	0.0095317	-0.343175
KIAA0664L3	-0.224318	5.28191	-3.6368	0.000503239	0.00955389	-0.346832
ANXA2P2	0.389851	10.4204	3.63674	0.00050334	0.00955389	-0.347015
PIP5K1A	-0.338116	6.40931	-3.63651	0.000503723	0.00955389	-0.34771
CPT1A	-0.423548	6.35212	-3.63639	0.000503916	0.00955389	-0.34806
NPTN	0.295278	7.6977	3.63611	0.000504393	0.00955574	-0.348925
LOC728040	-0.778331	4.10923	-3.63544	0.000505509	0.00956968	-0.350945
STX1A	0.262598	5.01528	3.6345	0.00050708	0.00959219	-0.35378
MRS2	-0.468561	5.71283	-3.634	0.000507906	0.00959339	-0.355268
C2orf88	-0.224802	3.75338	-3.63394	0.000508	0.00959339	-0.355437
FGF1	0.30731	3.85452	3.63377	0.000508287	0.00959339	-0.355953
PDK1	0.449014	5.26129	3.63318	0.000509276	0.00960485	-0.35773
TUBA1C	0.151638	6.78439	3.63282	0.000509891	0.00960924	-0.358832
S100A11	0.302853	8.83902	3.63203	0.000511216	0.00962039	-0.361204
SLC1A5	0.445631	5.33474	3.63201	0.000511247	0.00962039	-0.36126
NSMCE4A	-0.245325	5.3279	-3.63126	0.000512519	0.00963711	-0.36353
PCDH1	0.397872	5.70125	3.63084	0.000513224	0.00964317	-0.364787
INHBC	-0.896467	4.19175	-3.62891	0.000516497	0.00969742	-0.370595
ARL6IP5	0.345286	7.41986	3.62699	0.000519762	0.00975144	-0.376353
SLC7A11	0.944625	3.77315	3.62515	0.00052292	0.00979805	-0.381888
PPARGC1A	-0.9495	5.15042	-3.62509	0.000523025	0.00979805	-0.382071
FAM173B	-0.509049	5.1608	-3.62472	0.00052366	0.00980265	-0.38318
LAIR1	0.247527	4.5132	3.62397	0.000524964	0.00981975	-0.385452
HCN3	-0.198117	4.58514	-3.62205	0.000528286	0.00987456	-0.391216
RORC	-0.436398	5.26993	-3.62037	0.000531205	0.00992174	-0.396249
WNT7A	0.136199	3.27822	3.61837	0.000534703	0.00997967	-0.402245
MIR548H4	-0.180131	6.05276	-3.61726	0.000536654	0.0100087	-0.405572
PRLR	-0.432593	3.95612	-3.61689	0.000537319	0.0100136	-0.406703
SGTB	0.347103	4.21448	3.61543	0.000539895	0.0100414	-0.411071
FAM127A	0.295753	7.40449	3.61502	0.000540629	0.0100414	-0.412313
KLF13	0.132141	4.87409	3.615	0.000540663	0.0100414	-0.412369
LACE1	-0.195052	3.22442	-3.61476	0.000541086	0.0100414	-0.413085
KDELR3	0.432888	5.3512	3.61464	0.000541298	0.0100414	-0.413442
FTSJ1	0.241819	5.33644	3.61449	0.000541568	0.0100414	-0.413897
SNORD104	-0.506736	6.5543	-3.61447	0.0005416	0.0100414	-0.413952
PHF13	0.194414	4.73689	3.61395	0.000542521	0.010051	-0.415503
AGAP2	0.144974	4.31417	3.61243	0.000545251	0.0100942	-0.420088
PTP4A1P7	-0.212583	2.76867	-3.61214	0.000545763	0.0100962	-0.420945
AGTRAP	0.243682	5.39643	3.61006	0.0005495	0.0101579	-0.427177
NEUROD2	0.121431	3.1952	3.60945	0.000550603	0.0101708	-0.429009
ANKRD37	0.411382	5.65523	3.60894	0.000551524	0.0101771	-0.430534
MIR555	-0.33506	6.70782	-3.60881	0.000551751	0.0101771	-0.43091
SYCP3	-0.448096	3.7016	-3.60803	0.000553165	0.0101902	-0.433247
MPZL3	0.406126	4.7527	3.60797	0.000553274	0.0101902	-0.433428
POU3F2	0.090374	4.96748	3.60714	0.000554782	0.0102105	-0.435914
JAM3	0.448883	5.07174	3.60638	0.000556166	0.0102205	-0.438188
C4A-AS1	-0.654025	4.26469	-3.60618	0.000556546	0.0102205	-0.438812
C4B-AS1	-0.654025	4.26469	-3.60618	0.000556546	0.0102205	-0.438812
PIK3R6	0.139336	4.57335	3.60368	0.000561117	0.010297	-0.446282
LOC100507297	-0.253488	5.90213	-3.60339	0.000561644	0.0102991	-0.447139
SPDYE8P	-0.436724	6.28042	-3.60236	0.000563556	0.0103267	-0.450242
TPTE2P1	-0.117639	3.51643	-3.60194	0.000564332	0.0103333	-0.451497
PTHLH	0.725665	4.08277	3.6014	0.000565332	0.0103441	-0.453114
HINT2	-0.227411	5.62469	-3.60113	0.000565833	0.0103458	-0.453924
HRG	-1.30908	5.55159	-3.6004	0.000567176	0.0103628	-0.456088
OAS3	0.427283	5.05727	3.59998	0.000567959	0.0103696	-0.457347
KCNMB3P1	-0.364928	3.52562	-3.59954	0.000568777	0.010377	-0.458661
TRIP10	0.22646	5.95723	3.59801	0.000571644	0.0104217	-0.463252
C5	-1.24033	6.95379	-3.59756	0.00057248	0.0104294	-0.464586
HDGFRP2	0.12098	5.97388	3.59713	0.000573299	0.0104368	-0.46589
EGFL6	0.24353	4.00724	3.59661	0.00057426	0.0104437	-0.46742
OSBPL10	0.297153	4.16269	3.59648	0.000574512	0.0104437	-0.46782
PFN2	0.339581	4.89019	3.59553	0.000576296	0.0104643	-0.470651
JPX	-0.273088	7.00795	-3.59544	0.000576472	0.0104643	-0.47093
TAT	-1.06463	4.02596	-3.59495	0.000577396	0.0104729	-0.472392
ENO1	0.379767	7.09639	3.59475	0.000577781	0.0104729	-0.473001
FAM150B	-0.751187	5.02718	-3.5944	0.000578433	0.0104772	-0.47403
ASF1B	0.249771	4.87481	3.59384	0.000579502	0.010489	-0.475715
RN5S110	-0.204749	2.82484	-3.59195	0.000583102	0.0105466	-0.481368
PLXDC1	0.32258	4.87896	3.59138	0.000584185	0.0105586	-0.483062
BMS1P7	-0.293233	6.14732	-3.5911	0.00058472	0.0105606	-0.483897
LYRM5	-0.207761	4.74666	-3.59046	0.00058595	0.0105753	-0.485815
MALL	0.706197	6.11538	3.58976	0.00058729	0.0105918	-0.4879
HOOK1	-0.584449	5.95147	-3.58896	0.000588828	0.010612	-0.490288
IL6ST	-0.441038	8.22672	-3.58873	0.000589273	0.0106124	-0.490977
HES5	0.124882	6.24803	3.58848	0.000589751	0.0106134	-0.491716
POLG	0.171215	5.44355	3.58807	0.000590533	0.0106199	-0.492926
LINC00415	-0.200409	4.51816	-3.58758	0.000591493	0.0106261	-0.494408
CALY	0.1094	5.58747	3.58742	0.000591794	0.0106261	-0.494874
GON4L	-0.260699	5.60016	-3.58724	0.000592145	0.0106261	-0.495414
ADRB1	0.145439	4.52708	3.58691	0.000592784	0.01063	-0.496399
LRRC59	0.264884	6.31305	3.58571	0.000595112	0.0106641	-0.499976
NBL1	0.153216	4.93669	3.58533	0.000595848	0.0106697	-0.501104
MIR3682	-0.659187	3.44437	-3.585	0.000596493	0.0106732	-0.502092
SHROOM1	-0.185533	5.79194	-3.58465	0.000597183	0.0106732	-0.503147
CSTB	0.285006	7.45684	3.58458	0.000597316	0.0106732	-0.503349
KLK6	0.834018	5.15107	3.584	0.000598445	0.0106838	-0.505073
CYP4V2	-0.348051	6.1393	-3.58376	0.000598923	0.0106838	-0.505802
POLD1	0.12643	4.94422	3.58362	0.000599183	0.0106838	-0.506197
KCTD10	0.205709	5.78822	3.58299	0.000600418	0.0106982	-0.508076
WNT5A	0.521958	4.07136	3.58261	0.000601164	0.0107039	-0.509209
DRGX	0.123998	4.24487	3.58186	0.000602653	0.0107229	-0.511467
NBEA-AS1	0.300205	2.65609	3.58099	0.000604363	0.0107457	-0.514053
MST1	-0.290177	5.57091	-3.57975	0.000606821	0.0107806	-0.517756
KRT15	0.257712	3.8495	3.57955	0.000607216	0.0107806	-0.51835
C1orf43	-0.273524	7.17268	-3.57935	0.000607608	0.0107806	-0.51894
GCSHP3	-0.267627	5.6278	-3.57908	0.000608135	0.0107823	-0.519731
KRT17	0.657145	5.13474	3.57801	0.000610263	0.0108124	-0.522918
MST1R	0.287751	5.22693	3.57765	0.000610982	0.0108175	-0.523992
RPL36AP33	-0.73493	5.145	-3.57683	0.000612616	0.0108325	-0.526428
SLC25A24	0.347234	5.88429	3.5768	0.000612691	0.0108325	-0.52654
MIR548U	-0.264094	7.14473	-3.57577	0.000614751	0.0108613	-0.529602
LOC100506115	0.390499	4.60784	3.57498	0.000616332	0.0108816	-0.531947
PROX1-IT1	-0.584493	4.0485	-3.57322	0.000619879	0.0109289	-0.537182
KCND2	0.375872	3.55328	3.57094	0.000624507	0.0110009	-0.543967
RIMS3	0.101872	4.3033	3.57078	0.000624836	0.0110009	-0.544447
MED15	0.115864	5.91442	3.57048	0.00062545	0.011004	-0.545344
CERS2	-0.375675	7.80276	-3.56965	0.000627149	0.0110262	-0.547818
DPP7	0.156404	6.14547	3.5684	0.000629691	0.0110631	-0.551507
PXMP2	-0.402138	6.18524	-3.56782	0.000630899	0.0110763	-0.553256
GRIN2D	0.123849	4.38818	3.56761	0.00063132	0.0110763	-0.553865
PARVA	0.298872	6.93116	3.56731	0.000631946	0.0110795	-0.554769
SPTSSA	-0.379	7.19609	-3.56518	0.000636331	0.0111468	-0.561076
GSDMA	0.124182	3.64189	3.56502	0.000636667	0.0111468	-0.561557
CD63	0.138958	7.923	3.5632	0.000640462	0.0112054	-0.566977
LDLRAD2	0.103796	4.82893	3.56288	0.000641125	0.0112092	-0.567922
MSANTD3	0.226139	6.58757	3.56104	0.000644986	0.0112689	-0.573398
AP1M2	0.540554	4.94274	3.55978	0.00064762	0.0113071	-0.577113
PPP6R2	-0.17084	5.5674	-3.55923	0.000648791	0.0113196	-0.578761
PCSK6	-0.419486	4.97815	-3.55845	0.000650442	0.0113343	-0.581079
CYP2C19	-0.788181	4.89414	-3.5584	0.000650552	0.0113343	-0.581234
R3HDM4	0.167987	5.22059	3.55819	0.000650984	0.0113343	-0.581838
SMS	0.337842	6.99644	3.55727	0.000652942	0.0113591	-0.584578
APOL1	0.605507	6.60011	3.55706	0.000653377	0.0113591	-0.585185
PCED1B	0.335177	4.78984	3.55688	0.000653762	0.0113591	-0.585722
CEACAM6	1.51469	6.19958	3.55664	0.000654275	0.0113602	-0.586438
SLC16A9	-0.40612	3.81201	-3.55624	0.00065512	0.011363	-0.587614
RPS6KA1	0.259544	4.70678	3.55614	0.000655338	0.011363	-0.587917
SIAH2-AS1	-0.2341	5.58207	-3.5559	0.000655846	0.0113639	-0.588623
RHOG	0.202105	7.33952	3.55484	0.000658112	0.0113855	-0.591769
FAM32A	0.32783	6.47369	3.55484	0.000658115	0.0113855	-0.591773
UBA1	0.192477	6.97071	3.55468	0.000658451	0.0113855	-0.592238
FGFRL1	0.15042	5.805	3.55356	0.000660872	0.0114196	-0.595585
ZNF37A	-0.244443	4.9621	-3.55297	0.000662137	0.0114336	-0.597328
EHD1	0.120264	5.09521	3.55061	0.000667221	0.0114974	-0.604303
MIR1972-1	-0.130274	2.49895	-3.55056	0.00066734	0.0114974	-0.604464
MIR1972-2	-0.130274	2.49895	-3.55056	0.00066734	0.0114974	-0.604464
SEC62-AS1	-0.214659	6.26059	-3.55026	0.000667988	0.0114974	-0.60535
MIR320C1	-0.647467	5.56844	-3.55011	0.000668322	0.0114974	-0.605805
ARPC2	0.20694	7.65306	3.54999	0.000668575	0.0114974	-0.60615
PPARD	0.248585	5.61691	3.54964	0.000669333	0.0115026	-0.607184
S100A9	0.796307	6.56995	3.54871	0.000671364	0.0115296	-0.609945
GUK1	0.134419	5.95257	3.54656	0.000676067	0.0116024	-0.616309
WRAP73	0.102747	3.84771	3.54607	0.000677143	0.0116114	-0.617759
LOC644936	0.146609	5.60575	3.54577	0.00067779	0.0116114	-0.61863
MRPL46	-0.226329	5.32169	-3.54569	0.000677974	0.0116114	-0.618877
IQGAP2	-0.571653	5.2898	-3.54259	0.000684825	0.0117095	-0.628041
TIMP4	0.33186	3.21144	3.54246	0.000685122	0.0117095	-0.628436
HPS6	0.202132	4.53724	3.54244	0.000685157	0.0117095	-0.628484
LRRC24	0.167731	5.11459	3.54212	0.000685879	0.0117095	-0.629443
GTF2I	-0.319338	7.92786	-3.54205	0.000686029	0.0117095	-0.629643
TMOD3	0.204029	6.48467	3.54151	0.000687237	0.0117222	-0.631247
NUDT13	-0.268963	4.09932	-3.541	0.000688378	0.0117337	-0.632759
SPCS3	0.299972	6.64542	3.54068	0.000689078	0.0117377	-0.633685
LOC100505806	0.280556	3.85497	3.53992	0.000690789	0.0117588	-0.635944
C12orf59	0.125647	3.14637	3.53941	0.00069193	0.0117625	-0.637449
OR7E5P	-0.148143	7.27667	-3.53936	0.000692045	0.0117625	-0.637601
PPP1R9B	0.188186	5.60457	3.5392	0.000692407	0.0117625	-0.638077
PAQR9	-0.505979	4.73329	-3.53692	0.000697552	0.0118381	-0.644823
IL6R	-0.27126	5.11468	-3.53681	0.000697799	0.0118381	-0.645146
EIF5A	0.163233	6.41273	3.53454	0.000702943	0.0119128	-0.651839
LRRC25	0.202731	4.07954	3.53445	0.000703149	0.0119128	-0.652107
UBAC2-IT1	-0.233873	6.18905	-3.53363	0.000705015	0.0119364	-0.654522
ROR2	0.106368	3.94343	3.53248	0.000707648	0.0119729	-0.657919
COBRA1	0.163936	5.52231	3.53086	0.000711372	0.0120278	-0.662701
RANBP3	0.136803	6.18114	3.53	0.000713368	0.0120535	-0.665254
IGF2BP2	0.676366	5.14536	3.52891	0.000715876	0.0120848	-0.668451
MLLT10	-0.305399	6.18632	-3.52878	0.000716185	0.0120848	-0.668845
LOC100507404	-0.238601	3.71106	-3.52807	0.000717839	0.0121046	-0.670946
SPA17	0.420854	4.49263	3.52768	0.000718736	0.0121116	-0.672085
NBPF16	-0.293413	8.24648	-3.52685	0.00072068	0.012135	-0.674545
KLC1	0.251844	6.02247	3.52655	0.000721373	0.012135	-0.675421
HEY2	0.275701	4.32107	3.52646	0.000721584	0.012135	-0.675687
NUP153	-0.26365	7.2812	-3.52626	0.00072205	0.012135	-0.676275
CYP2E1	-1.04019	4.88227	-3.52564	0.000723498	0.0121512	-0.678101
NECAP2	0.234852	5.50577	3.52422	0.000726832	0.0121945	-0.682289
SLC25A44	-0.252418	5.63703	-3.52413	0.000727045	0.0121945	-0.682555
CHST11	0.301711	5.07852	3.52127	0.000733803	0.0122996	-0.690985
NACA	-0.159967	8.08031	-3.52099	0.000734454	0.0123024	-0.691792
NEU3	-0.12148	4.69983	-3.52033	0.000736028	0.0123205	-0.693742
ARHGAP18	0.467457	6.1323	3.52001	0.0007368	0.0123228	-0.694697
LOC399744	-0.229183	6.66092	-3.51986	0.000737145	0.0123228	-0.695123
POFUT2	0.127955	4.66853	3.51896	0.00073929	0.0123505	-0.69777
FMO4	-0.609158	4.21833	-3.51788	0.00074189	0.0123857	-0.700967
ZNF527	-0.18799	3.72618	-3.51765	0.000742432	0.0123865	-0.701632
OLFML2A	0.20229	4.99416	3.51736	0.000743129	0.0123899	-0.702487
MIR3664	-0.121486	2.26941	-3.5171	0.000743758	0.0123922	-0.703258
MSR1	0.392325	4.7205	3.51596	0.000746498	0.0124222	-0.706607
RAPGEF6	-0.227797	5.23851	-3.51594	0.000746548	0.0124222	-0.706668
ACOT7	0.178519	5.18053	3.51573	0.000747042	0.0124222	-0.707271
ASPHD2	0.197172	5.27218	3.51547	0.00074767	0.0124245	-0.708035
GNB4	0.451363	5.22264	3.5145	0.000750015	0.0124552	-0.710887
TP53I11	0.193461	5.25226	3.51379	0.000751736	0.012467	-0.712975
TOP1P1	-0.377611	3.15431	-3.5137	0.000751969	0.012467	-0.713258
GANAB	0.204344	7.16546	3.5136	0.000752214	0.012467	-0.713553
MYO9A	0.262306	4.55719	3.51316	0.00075328	0.0124765	-0.714844
VENTX	0.126293	4.65353	3.51223	0.00075553	0.0125016	-0.71756
IFI27L2	0.28843	5.18187	3.51213	0.000755793	0.0125016	-0.717876
CDC42EP2	0.199259	5.47982	3.51188	0.000756392	0.0125033	-0.718598
SLC22A5	-0.308429	4.90214	-3.51111	0.000758274	0.0125262	-0.720861
CAPG	0.310924	5.56406	3.51085	0.000758902	0.0125284	-0.721614
DIRAS1	0.0992142	6.62461	3.5098	0.000761495	0.0125629	-0.72472
MRPS6	0.287474	4.28048	3.50938	0.000762518	0.0125716	-0.725943
ZCCHC11	-0.394295	5.4857	-3.50876	0.00076404	0.0125884	-0.727759
RBMS2	0.364818	6.77387	3.50854	0.000764579	0.012589	-0.728401
NDUFB1	-0.159779	8.12345	-3.5063	0.000770143	0.01266	-0.735004
KRT6C	0.63374	5.07586	3.50598	0.000770919	0.01266	-0.73592
SPINT2	0.490897	6.89722	3.50587	0.000771192	0.01266	-0.736242
TPRA1	0.113366	5.17576	3.50584	0.000771275	0.01266	-0.73634
BZW1	0.280112	6.79212	3.50579	0.000771404	0.01266	-0.736492
FCGR3B	0.549915	5.11039	3.50488	0.000773661	0.0126888	-0.739153
VAV1	0.306999	4.42644	3.50345	0.000777237	0.0127377	-0.743351
MAPK7	0.131397	5.46105	3.50328	0.00077766	0.0127377	-0.743846
RAB1B	0.205491	7.53601	3.50258	0.000779424	0.0127583	-0.745909
HOXB2	0.214822	4.25205	3.50085	0.000783777	0.0128212	-0.750979
CHMP1A	0.171114	5.63636	3.49977	0.000786527	0.0128381	-0.754168
GABRA4	0.0771989	2.95284	3.49973	0.000786623	0.0128381	-0.754279
ITCH-AS1	-0.180068	6.35352	-3.49965	0.000786827	0.0128381	-0.754515
CCL13	0.642698	3.84013	3.49964	0.000786847	0.0128381	-0.754537
S100A16	0.265073	6.94258	3.49928	0.000787747	0.0128444	-0.755579
ETV1	0.500363	4.45113	3.49863	0.000789417	0.0128633	-0.757506
GUCY1A2	0.343199	4.24352	3.49813	0.000790678	0.0128755	-0.75896
RAB11FIP5	0.143153	4.83627	3.49746	0.000792394	0.0128951	-0.760933
KLHDC2	-0.284403	6.22157	-3.49637	0.000795162	0.0129234	-0.764107
NIT1	-0.236423	5.72465	-3.49423	0.000800669	0.0130045	-0.770388
STX12	0.240299	5.5927	3.49395	0.000801392	0.0130079	-0.77121
SYBU	-0.373609	4.45777	-3.49334	0.000802956	0.0130249	-0.772985
PLSCR3	0.151763	5.41746	3.49257	0.000804969	0.0130491	-0.775263
WDFY2-AS1	-0.155181	2.39875	-3.49147	0.000807805	0.0130866	-0.778464
SERPINA5	-0.652202	5.88081	-3.49106	0.000808888	0.0130958	-0.779683
SNAPC2	0.15814	4.6394	3.48975	0.000812283	0.0131423	-0.783494
MANF	0.209029	7.10163	3.4888	0.000814775	0.0131671	-0.786282
ABCC6P1	-0.417182	4.89834	-3.48877	0.000814866	0.0131671	-0.786384
SGIP1	0.442594	4.25722	3.48707	0.000819309	0.0132304	-0.791332
RN5S70	-0.379147	4.05985	-3.48571	0.000822902	0.0132799	-0.795314
COL6A4P2	0.145846	3.25823	3.48484	0.000825227	0.0133069	-0.797881
APOBEC2	-0.173196	3.4658	-3.48468	0.00082563	0.0133069	-0.798325
IQCC	0.135794	4.6487	3.483	0.000830112	0.0133705	-0.80325
CNP	0.18681	5.52527	3.47922	0.000840239	0.0135169	-0.814283
LOC100190986	-0.585364	7.84963	-3.47913	0.000840482	0.0135169	-0.814546
SLC7A5	0.541515	5.24974	3.47901	0.00084081	0.0135169	-0.8149
FCGR2A	0.499652	5.7317	3.47851	0.000842156	0.0135299	-0.816355
OTC	-1.02162	3.25194	-3.4771	0.000845985	0.0135827	-0.820482
NDUFS1	-0.225733	6.38301	-3.47632	0.0008481	0.013608	-0.822754
AP2A1	0.14835	5.94854	3.47344	0.000855968	0.013716	-0.831153
GDE1	0.300739	6.53421	3.47325	0.000856497	0.013716	-0.831716
RAB35	0.221707	6.02447	3.47317	0.00085672	0.013716	-0.831952
ZNF532	0.374794	5.943	3.47306	0.000857009	0.013716	-0.832258
SEMA3B	0.163217	5.10069	3.4722	0.000859385	0.0137452	-0.834777
ELOVL2-AS1	-0.112394	3.41348	-3.47124	0.000862021	0.0137786	-0.837562
TSPAN14	0.230012	6.93746	3.47054	0.000863973	0.0137943	-0.83962
INTS7	-0.297318	5.31019	-3.47029	0.000864665	0.0137943	-0.840347
ACTR3	0.214204	7.66876	3.47015	0.000865033	0.0137943	-0.840735
SNX8	0.139972	4.46301	3.46993	0.000865648	0.0137943	-0.841381
SLC35G1	-0.268274	4.00501	-3.4699	0.000865741	0.0137943	-0.841479
NUP35	-0.234908	4.20021	-3.4697	0.000866288	0.0137943	-0.842053
KRT6A	0.74286	4.82827	3.46849	0.000869657	0.0138392	-0.845583
LOC100505702	0.290516	4.20876	3.46696	0.000873932	0.0138984	-0.850043
RRN3P3	-0.229339	5.36309	-3.46667	0.000874736	0.0139024	-0.850879
TPRG1L	0.272668	6.91034	3.46645	0.000875358	0.0139034	-0.851525
CRABP2	0.380412	4.88353	3.46626	0.000875904	0.0139034	-0.852092
TRAPPC12-AS1	-0.238424	4.24968	-3.46569	0.000877496	0.0139175	-0.853743
TMLHE	-0.250842	5.61643	-3.46541	0.000878267	0.0139175	-0.854542
SH3KBP1	0.293595	5.74499	3.46535	0.000878456	0.0139175	-0.854737
BRPF1	0.111782	4.89376	3.46505	0.000879296	0.0139221	-0.855606
RAB5C	0.165607	8.1424	3.46433	0.000881309	0.0139452	-0.857686
CCDC81	0.108816	2.71788	3.46157	0.000889142	0.0140603	-0.865732
UBR3	-0.223996	5.77845	-3.46136	0.00088974	0.0140609	-0.866343
LOC100507291	-0.201679	4.28139	-3.46078	0.000891399	0.0140783	-0.868036
DCLRE1B	0.245704	5.28736	3.46032	0.000892705	0.0140901	-0.869368
FCGR1B	0.63517	4.51158	3.45997	0.000893712	0.0140971	-0.870393
NF2	0.216321	4.89176	3.45939	0.000895353	0.0141142	-0.872061
CROT	-0.40599	4.13752	-3.45816	0.000898892	0.0141599	-0.875647
LOC731275	-0.303126	7.12327	-3.45799	0.000899379	0.0141599	-0.876139
NKD1	0.276228	4.84388	3.45775	0.000900075	0.014162	-0.876843
MIR548O2	-0.314289	8.2857	-3.45727	0.000901445	0.0141667	-0.878226
MRPL45P2	-0.227408	6.14327	-3.45726	0.0009015	0.0141667	-0.87828
BHMT2	-0.859712	5.09368	-3.45702	0.000902175	0.0141684	-0.878961
TRMT61B	-0.204945	4.65768	-3.4549	0.000908301	0.0142486	-0.885113
GALNT3	0.542198	4.9168	3.45483	0.000908518	0.0142486	-0.88533
PFN1P2	-0.422415	7.41602	-3.45467	0.000908977	0.0142486	-0.88579
MPRIP	0.285346	6.17165	3.45404	0.000910809	0.0142684	-0.887619
PITPNM1	0.132871	5.13803	3.45299	0.000913877	0.0143075	-0.890676
MIR194-1	-0.369798	2.69969	-3.45188	0.000917121	0.0143362	-0.893897
TMEM161B-AS1	-0.261712	4.43589	-3.45179	0.000917378	0.0143362	-0.894152
RPS6KA4	0.119498	4.68595	3.45161	0.000917905	0.0143362	-0.894673
MBNL3	-0.526084	5.01787	-3.45158	0.000917987	0.0143362	-0.894755
FOXK2	0.159593	5.95146	3.45052	0.000921115	0.0143761	-0.897847
ZNF684	-0.373723	4.55904	-3.44981	0.000923198	0.0143819	-0.8999
KDM4D	0.103156	2.44523	3.4498	0.000923225	0.0143819	-0.899926
LOC100506740	0.142588	2.64797	3.44968	0.000923592	0.0143819	-0.900287
MINK1	0.213557	5.84415	3.44962	0.000923768	0.0143819	-0.900461
SNX25	0.386061	5.07157	3.44883	0.000926103	0.0144093	-0.902755
MXRA5P1	0.172592	3.52146	3.44728	0.000930704	0.0144719	-0.90726
TNRC6A	-0.312336	6.32386	-3.44605	0.000934355	0.0145197	-0.910817
HCFC1R1	0.250035	6.05224	3.44453	0.000938882	0.0145811	-0.91521
LRRC20	0.163954	4.67567	3.444	0.000940478	0.0145969	-0.916753
ARL17A	-0.339084	6.00711	-3.44373	0.000941289	0.0146004	-0.917537
ARL8B	0.229542	6.68662	3.44256	0.000944824	0.0146458	-0.920942
EMC1	0.184576	4.68256	3.44232	0.000945529	0.0146458	-0.92162
MIR558	-0.406371	3.13103	-3.44218	0.000945961	0.0146458	-0.922035
GDF9	-0.0904197	3.22786	-3.44	0.000952546	0.0147298	-0.928338
FAM149A	-0.329533	4.99494	-3.44	0.000952557	0.0147298	-0.928349
FKBP1AP1	-0.217034	7.67244	-3.43831	0.000957715	0.0148005	-0.933255
MYO5A	0.390946	4.8349	3.43807	0.000958428	0.0148024	-0.933931
HPX	-1.00208	4.97383	-3.43648	0.000963304	0.0148686	-0.938542
FEZ1	0.219237	4.17695	3.43571	0.000965681	0.0148873	-0.94078
MAP1S	0.144486	5.22569	3.4357	0.000965699	0.0148873	-0.940798
COBLL1	-0.284613	5.07323	-3.43511	0.000967516	0.0149061	-0.942505
MRPS25	-0.338608	4.97876	-3.43327	0.000973198	0.0149845	-0.947824
QTRT1	-0.175994	5.54861	-3.43306	0.00097385	0.0149854	-0.948433
NBPF14	-0.297359	9.33938	-3.43236	0.000976033	0.0149952	-0.950467
UBE2J1	0.270189	6.87569	3.43232	0.000976136	0.0149952	-0.950562
LOC100287314	0.729567	5.17378	3.43228	0.000976274	0.0149952	-0.950691
CRIP1	0.355181	6.23426	3.43199	0.000977182	0.015	-0.951536
DEFB109P1	-0.540189	4.52135	-3.43161	0.00097837	0.015009	-0.952639
MIR1302-11	-0.0980596	3.93571	-3.42993	0.000983606	0.0150802	-0.957487
REM1	0.131446	4.35793	3.42934	0.000985458	0.0150993	-0.959196
MLXIP	0.237757	6.06186	3.42783	0.000990204	0.0151554	-0.963559
FAM35A	-0.278135	5.45376	-3.42779	0.00099032	0.0151554	-0.963666
PPAP2B	-0.337471	5.80555	-3.42735	0.000991703	0.0151673	-0.964933
GYS1	0.180602	4.95925	3.4269	0.000993124	0.0151765	-0.966234
GORAB	-0.343756	4.36387	-3.42678	0.000993508	0.0151765	-0.966585
CYP3A7	-1.00804	4.59853	-3.42617	0.00099544	0.0151924	-0.96835
STAC	0.218361	3.23823	3.42607	0.000995759	0.0151924	-0.968641
BHLHE40	0.43913	7.21017	3.42325	0.00100473	0.01532	-0.976786
C2CD2L	0.123891	4.5505	3.423	0.00100553	0.015323	-0.977512
ELOVL4	0.176945	3.34322	3.42245	0.00100727	0.0153401	-0.979075
PDCD4	-0.367216	7.10572	-3.42203	0.00100861	0.0153411	-0.980289
PLEK2	0.531075	5.08984	3.42167	0.00100979	0.0153411	-0.981348
HS3ST5	0.0808652	3.49175	3.42142	0.00101058	0.0153411	-0.982054
FCGR1A	0.595065	4.36806	3.42114	0.00101149	0.0153411	-0.982871
CTSB	0.263204	7.61432	3.42113	0.00101153	0.0153411	-0.982908
PMS2P4	-0.266554	6.48647	-3.42109	0.00101163	0.0153411	-0.983
MRPL17	0.319833	5.63905	3.421	0.00101193	0.0153411	-0.983269
RN5S118	-0.191807	2.23189	-3.42091	0.00101221	0.0153411	-0.983522
NMRK1	-0.246286	4.40351	-3.42018	0.00101458	0.0153677	-0.985642
CD300LF	0.233036	4.41882	3.41972	0.00101605	0.0153717	-0.986957
RPRD2	-0.379334	6.71394	-3.41972	0.00101606	0.0153717	-0.986971
DKK2	0.210731	3.16124	3.41913	0.00101798	0.0153822	-0.988678
KIAA1598	-0.370453	6.44014	-3.41912	0.00101798	0.0153822	-0.988683
GDI1	0.138555	6.116	3.41784	0.00102213	0.0154351	-0.992377
COG2	-0.245466	4.54477	-3.41767	0.00102271	0.0154351	-0.992886
LOC202181	-0.250252	6.24334	-3.41714	0.00102441	0.0154515	-0.9944
PROC	-0.453554	5.64442	-3.41673	0.00102576	0.0154626	-0.995591
KDM4B	0.121277	4.85771	3.41603	0.00102805	0.0154809	-0.997617
CCDC107	0.213021	5.20042	3.41598	0.0010282	0.0154809	-0.997753
CEP70	-0.456601	5.32424	-3.41574	0.00102899	0.0154835	-0.998451
TSPAN3	0.372673	6.57867	3.41548	0.00102983	0.0154856	-0.999186
SIGLEC7	0.18544	4.16713	3.41532	0.00103036	0.0154856	-0.999659
PRSS48	-0.325622	4.51978	-3.41468	0.00103246	0.0155079	-1.00151
DRP2	0.146485	3.55439	3.41356	0.00103613	0.0155354	-1.00473
TRIM47	0.248296	5.87824	3.41335	0.00103682	0.0155354	-1.00533
MIRLET7DHG	-0.141449	4.21429	-3.41335	0.00103682	0.0155354	-1.00533
VGLL4	0.135953	5.85003	3.41335	0.00103683	0.0155354	-1.00534
LOC100505794	-0.470048	4.1485	-3.41316	0.00103744	0.0155354	-1.00587
HOMER3	0.176927	5.92843	3.41299	0.001038	0.0155354	-1.00636
PTPRU	0.318687	4.96675	3.41187	0.00104171	0.0155817	-1.0096
TYRP1	0.268272	2.63191	3.41098	0.00104464	0.0156161	-1.01215
C1orf144	0.1961	5.80075	3.40892	0.00105147	0.015709	-1.01807
COL22A1	0.120655	4.11623	3.40814	0.00105409	0.0157388	-1.02033
CYP21A2	-0.298991	4.75807	-3.40772	0.00105548	0.0157502	-1.02152
ZFYVE21	0.215555	6.12854	3.40632	0.00106017	0.0158108	-1.02555
HTRA4	0.334299	3.85639	3.40543	0.00106317	0.0158462	-1.02811
STAG3L3	-0.279701	6.61291	-3.40485	0.00106514	0.015859	-1.02979
FGD4	-0.469698	6.39741	-3.4048	0.00106529	0.015859	-1.02992
DNASE2	0.283019	6.53462	3.40427	0.00106711	0.0158681	-1.03146
TMEM173	0.253894	5.24022	3.40425	0.00106717	0.0158681	-1.03151
UBE2U	-0.509084	2.53969	-3.40312	0.00107097	0.0159153	-1.03475
BMP4	0.358466	4.79284	3.40293	0.00107162	0.0159155	-1.0353
STK11	0.121773	5.31568	3.40242	0.00107337	0.0159311	-1.03678
RPS6KA2	0.217291	4.51051	3.40225	0.00107394	0.0159311	-1.03725
JOSD1	0.175425	5.96378	3.39933	0.00108391	0.0160646	-1.04565
TMEM107	0.23332	4.38807	3.39924	0.00108421	0.0160646	-1.0459
DNAJB7	-0.25688	2.99534	-3.39801	0.00108846	0.0161099	-1.04944
RUFY2	-0.223178	5.30079	-3.39794	0.00108869	0.0161099	-1.04964
LOC100507495	-0.210917	4.74164	-3.3978	0.00108919	0.0161099	-1.05005
RNU6-82	-0.547189	3.85884	-3.39733	0.0010908	0.0161242	-1.05139
LPHN2	0.487207	4.99801	3.39676	0.00109276	0.0161437	-1.05302
TMEM220	-0.366562	4.24975	-3.39622	0.00109462	0.0161601	-1.05456
C21orf49	-0.159696	3.0316	-3.39607	0.00109516	0.0161601	-1.05501
GYG2P1	-0.123815	5.01121	-3.39494	0.00109908	0.0162029	-1.05825
TADA3	0.164226	4.91969	3.39486	0.00109934	0.0162029	-1.05847
BCL9L	0.195544	6.39036	3.39356	0.00110388	0.0162603	-1.06221
LOC388242	0.141852	5.13105	3.39215	0.00110883	0.0163236	-1.06627
APOM	-0.768595	5.66698	-3.3915	0.00111109	0.0163473	-1.06811
GIT1	0.193425	5.60295	3.39024	0.00111553	0.016403	-1.07173
OSCAR	0.158967	4.4894	3.38876	0.00112074	0.0164623	-1.07596
KRBA2	-0.337605	3.95965	-3.38873	0.00112087	0.0164623	-1.07606
METRN	0.190261	6.90544	3.38774	0.00112438	0.0164946	-1.0789
YARS	0.302338	5.25923	3.3868	0.00112771	0.0165338	-1.08158
ARHGEF7-AS2	0.11991	3.66471	3.38438	0.00113635	0.0166509	-1.0885
ZBED3	-0.181164	5.18759	-3.38368	0.00113886	0.0166779	-1.09051
SYTL2	0.648183	5.20539	3.38252	0.00114307	0.0167269	-1.09385
ANKRD29	-0.536368	4.37511	-3.38239	0.00114354	0.0167269	-1.09422
ABCC6	-0.277579	5.14067	-3.38194	0.00114513	0.0167405	-1.09548
TXNDC16	-0.266024	3.62454	-3.38058	0.00115007	0.0168029	-1.09938
CLIC3	0.246969	4.78719	3.38037	0.00115084	0.0168043	-1.09999
DDA1	0.238956	7.28904	3.37981	0.00115286	0.0168152	-1.10158
CDH13	0.372131	4.64395	3.3798	0.00115291	0.0168152	-1.10162
SEC16B	-0.349412	4.6629	-3.37934	0.00115456	0.0168295	-1.10292
VPS37B	0.29083	5.66974	3.37855	0.00115744	0.0168616	-1.10518
PPM1M	0.155821	4.6888	3.37799	0.00115951	0.016882	-1.1068
SEC61A1	0.179765	7.43837	3.37682	0.00116379	0.0169201	-1.11014
ATP1A1OS	-0.227743	4.52386	-3.3768	0.00116386	0.0169201	-1.1102
DEFB109P1B	-0.494574	3.58581	-3.37669	0.00116425	0.0169201	-1.1105
ANXA2	0.410959	8.90072	3.37614	0.00116628	0.0169201	-1.11208
DDX17	-0.224086	8.54186	-3.37611	0.00116639	0.0169201	-1.11216
FBXO9	-0.246225	5.57842	-3.37598	0.00116687	0.0169201	-1.11253
GOLGA2P5	-0.212644	4.64826	-3.37556	0.0011684	0.0169201	-1.11373
UTF1	0.135686	4.65089	3.37553	0.00116852	0.0169201	-1.11382
LIMS1	0.325102	6.4344	3.37544	0.00116886	0.0169201	-1.11408
CHST15	0.393784	5.41818	3.37538	0.00116908	0.0169201	-1.11425
LOC100130855	-0.163926	4.58013	-3.37526	0.00116952	0.0169201	-1.11459
SULT1A2	-0.276003	5.66027	-3.37472	0.00117151	0.0169363	-1.11613
JKAMP	0.255327	5.49709	3.37459	0.00117199	0.0169363	-1.11651
SAMD9L	0.755941	5.22715	3.37399	0.0011742	0.0169562	-1.11822
SH3PXD2B	0.284338	4.98421	3.37385	0.00117472	0.0169562	-1.11861
ITGB6	0.888413	3.782	3.37334	0.00117662	0.0169739	-1.12008
GLUD1	-0.307185	6.99043	-3.37303	0.00117775	0.0169806	-1.12095
TUBB6	0.204173	6.50543	3.37278	0.0011787	0.0169845	-1.12168
C5orf45	-0.140053	5.3947	-3.37196	0.00118173	0.0170185	-1.12401
EXOC3	-0.175126	5.79033	-3.37165	0.00118288	0.0170253	-1.12489
DRAP1	0.170034	5.88469	3.37126	0.00118434	0.0170365	-1.12601
KRT8P41	0.133297	2.68706	3.37106	0.00118508	0.0170374	-1.12657
C1orf133	0.203247	3.10696	3.37012	0.00118861	0.0170665	-1.12927
MIR409	0.102905	2.17383	3.37003	0.00118895	0.0170665	-1.12953
LOC100505827	-0.134861	4.5105	-3.36985	0.00118961	0.0170665	-1.13003
HCRT	0.165427	5.10533	3.3698	0.00118982	0.0170665	-1.13019
CES1P1	-0.666	4.56866	-3.3689	0.00119317	0.0171049	-1.13274
ADH6	-0.766183	3.67989	-3.36854	0.00119453	0.0171145	-1.13377
LOC100506939	0.129926	2.6779	3.36747	0.00119857	0.0171627	-1.13684
IFITM10	0.238318	5.57095	3.36684	0.00120095	0.0171869	-1.13863
KIAA1755	0.0910305	4.23056	3.36526	0.00120693	0.0172606	-1.14313
RNASE1	0.539913	5.73292	3.36512	0.00120747	0.0172606	-1.14354
SLC38A3	-0.768034	5.71157	-3.36459	0.00120946	0.0172793	-1.14504
SH3BP1	0.0979267	4.80531	3.36422	0.00121087	0.0172896	-1.14609
UMPS	-0.181168	5.49154	-3.36332	0.00121431	0.0173289	-1.14866
VEPH1	-0.829281	4.48706	-3.36159	0.00122092	0.0174134	-1.15358
CTSC	0.682756	7.4982	3.36104	0.00122304	0.0174336	-1.15515
GALK2	-0.284684	4.99368	-3.3604	0.00122552	0.0174558	-1.15699
CSK	0.151253	5.43407	3.36028	0.00122598	0.0174558	-1.15732
ITGB2	0.266674	5.39718	3.35773	0.00123582	0.0175755	-1.16457
MGC4294	0.146536	3.43117	3.35768	0.00123602	0.0175755	-1.16472
DROSHA	-0.242747	5.45704	-3.35741	0.00123708	0.0175755	-1.16549
DEPDC5	-0.183559	4.84283	-3.35737	0.00123725	0.0175755	-1.16562
MST1P9	-0.38085	5.77156	-3.3572	0.00123788	0.0175755	-1.16608
CAMK2N1	0.341097	7.55815	3.35691	0.00123904	0.0175821	-1.16693
MIR2964A	0.0947822	2.80814	3.35641	0.00124098	0.0175997	-1.16835
BHMT	-0.772853	3.88792	-3.35602	0.0012425	0.0176113	-1.16946
SLC2A3	0.685569	6.06383	3.35503	0.00124637	0.0176562	-1.17227
C9orf131	-0.185057	3.89529	-3.35441	0.0012488	0.0176806	-1.17403
CLEC11A	0.168903	4.86304	3.35326	0.00125331	0.0177345	-1.1773
ABCC6P2	-0.504768	5.2105	-3.35276	0.00125528	0.0177497	-1.17872
ETV5	0.341789	5.1726	3.35263	0.00125579	0.0177497	-1.17909
SYDE1	0.144556	5.38454	3.35232	0.00125701	0.0177569	-1.17997
LOC100653324	0.136529	3.29995	3.35171	0.0012594	0.0177808	-1.1817
KDELC2	0.357303	6.21451	3.35089	0.00126264	0.0178165	-1.18402
RDH12	-0.125709	4.04267	-3.35022	0.00126532	0.0178442	-1.18594
UCN2	0.183159	5.18584	3.35001	0.00126613	0.0178457	-1.18652
SPINK9	-0.189319	3.29808	-3.34909	0.00126982	0.0178751	-1.18915
TGFBR3L	0.189573	5.69003	3.34907	0.00126987	0.0178751	-1.1892
LZTS1	0.0977886	5.22709	3.34879	0.001271	0.0178751	-1.19
ZNF519	-0.165376	4.15302	-3.34878	0.00127106	0.0178751	-1.19004
CYP27C1	0.14973	2.95647	3.34825	0.00127315	0.0178945	-1.19153
MAP3K5	0.530787	4.6921	3.34622	0.00128127	0.0179986	-1.19729
HSDL2	-0.410559	5.40924	-3.34482	0.00128691	0.0180551	-1.20127
GMPPB	0.0991073	4.37063	3.34476	0.00128715	0.0180551	-1.20144
RUNDC3B	-0.250842	3.62556	-3.34469	0.00128745	0.0180551	-1.20164
APOB	-1.44154	8.11278	-3.34406	0.00129	0.0180809	-1.20344
NELF	0.158547	5.29155	3.34363	0.00129171	0.0180948	-1.20464
TRIL	0.171431	3.39831	3.34259	0.00129596	0.0181442	-1.20762
NADK	0.131142	5.04486	3.3424	0.00129671	0.0181445	-1.20813
CLMP	0.378324	3.60513	3.34219	0.00129758	0.0181467	-1.20875
RN5S235	-0.337731	3.09112	-3.34172	0.00129948	0.0181631	-1.21007
KIF5A	0.0985787	3.28093	3.34142	0.00130068	0.0181698	-1.21091
RN5S163	-0.45397	3.33015	-3.34118	0.00130166	0.0181734	-1.21159
LOC100128511	0.13503	4.10904	3.34048	0.00130455	0.0182036	-1.21359
ADORA3	0.302373	3.96797	3.34024	0.00130552	0.0182071	-1.21427
LOC100505865	0.469987	3.95653	3.33976	0.00130749	0.0182245	-1.21563
LOC100505573	0.35508	5.33102	3.33932	0.00130929	0.0182304	-1.21688
ANXA5	0.239605	7.87411	3.3393	0.00130937	0.0182304	-1.21693
MMP7	1.12947	6.70463	3.33901	0.00131057	0.0182371	-1.21777
NHLRC2	-0.289328	6.40938	-3.33834	0.0013133	0.018265	-1.21965
MIR31HG	0.34002	3.47485	3.33745	0.00131697	0.0183059	-1.22218
OLR1	0.816185	5.13367	3.33521	0.00132622	0.0184199	-1.22851
PLXNA3	0.230521	5.33549	3.33511	0.00132664	0.0184199	-1.2288
NETO2	0.451155	3.74622	3.33399	0.0013313	0.0184596	-1.23197
CDK11A	0.17803	5.47879	3.33392	0.00133161	0.0184596	-1.23219
BPHL	-0.260149	5.89798	-3.33359	0.00133297	0.0184596	-1.23311
ZNF211	0.213518	4.80894	3.33336	0.00133394	0.0184596	-1.23377
SNORA7B	-0.213041	5.63462	-3.33334	0.00133401	0.0184596	-1.23381
HYOU1	0.337184	6.79974	3.33305	0.00133522	0.0184596	-1.23464
PFN1	0.237096	8.16984	3.33295	0.00133564	0.0184596	-1.23492
SGCE	0.539669	5.1073	3.33286	0.00133603	0.0184596	-1.23519
LOC100131289	-0.246331	3.66952	-3.33284	0.0013361	0.0184596	-1.23523
IL31RA	0.232104	3.22492	3.33089	0.00134428	0.0185624	-1.24076
ST3GAL1	0.341251	5.33176	3.33041	0.00134627	0.0185797	-1.2421
TMEM26	0.192201	3.27392	3.32935	0.00135074	0.0186312	-1.2451
TMEM151A	0.191083	4.63606	3.32813	0.00135589	0.018692	-1.24855
SEMA4B	0.357874	5.6567	3.32765	0.00135794	0.0187037	-1.24991
HHIPL1	0.122018	4.04928	3.32758	0.00135823	0.0187037	-1.2501
EFCAB6	-0.198078	3.48861	-3.32724	0.0013597	0.0187137	-1.25108
MIR1245A	0.448309	2.27196	3.32685	0.00136135	0.0187262	-1.25218
ACOT12	-0.633144	3.28257	-3.32633	0.00136355	0.0187461	-1.25364
LOC100505994	0.365082	3.95179	3.32616	0.00136429	0.0187461	-1.25413
ZNF852	-0.177335	4.15615	-3.3251	0.0013688	0.0187881	-1.25712
RNF126	0.162583	6.39943	3.32509	0.00136884	0.0187881	-1.25715
IGF2BP3	0.748134	4.19991	3.32262	0.00137945	0.0189179	-1.26414
KPNA2	0.402093	7.30659	3.32254	0.0013798	0.0189179	-1.26436
WASH1	-0.14838	6.17372	-3.32166	0.00138357	0.0189531	-1.26684
HIVEP2	0.312966	6.62442	3.32159	0.00138387	0.0189531	-1.26703
FAM63A	-0.343649	5.89978	-3.321	0.00138645	0.018978	-1.26871
RNU7-48P	-0.350193	6.5454	-3.32021	0.00138987	0.0190146	-1.27094
ZBTB20	-0.493904	6.34527	-3.31945	0.00139315	0.0190483	-1.27307
RAVER1	0.126264	5.90248	3.31927	0.00139394	0.0190483	-1.27359
LOC100289019	-0.210727	4.44395	-3.31912	0.00139461	0.0190483	-1.27402
ZNF233	-0.29146	4.36165	-3.31875	0.00139619	0.0190575	-1.27505
DPP3	0.182631	5.09082	3.31861	0.0013968	0.0190575	-1.27544
LILRB3	0.16708	4.83782	3.31819	0.00139864	0.0190723	-1.27664
S100A2	0.611471	5.23439	3.31771	0.00140074	0.0190906	-1.27799
NCOR2	0.164749	6.05887	3.31704	0.00140367	0.0191202	-1.27988
AGR2	0.975203	4.07835	3.31635	0.00140669	0.0191509	-1.28183
EIF1AD	0.195254	5.74256	3.31528	0.00141139	0.0191869	-1.28484
FAR1	0.408004	5.93358	3.31519	0.00141178	0.0191869	-1.2851
PCMTD2	-0.311432	6.16198	-3.31501	0.00141258	0.0191869	-1.28561
HS1BP3-IT1	-0.280548	4.00399	-3.3149	0.00141304	0.0191869	-1.2859
AMBP	-1.12087	6.6346	-3.31472	0.00141384	0.0191869	-1.28641
FLJ32955	-0.244896	3.49898	-3.31471	0.00141391	0.0191869	-1.28646
RIMKLA	0.176362	3.48069	3.31423	0.00141599	0.0191888	-1.28779
KRTAP24-1	0.0811574	2.15159	3.31421	0.00141612	0.0191888	-1.28787
FZD2	0.140458	6.36161	3.31416	0.00141634	0.0191888	-1.28801
MAP2K2	0.142109	6.3339	3.31354	0.00141905	0.0191938	-1.28974
ADC	0.098545	4.3504	3.31335	0.00141991	0.0191938	-1.29029
LHB	0.268469	5.56665	3.31327	0.00142027	0.0191938	-1.29052
IRF7	0.124927	5.48396	3.31314	0.00142082	0.0191938	-1.29087
PRDM1	0.516016	5.0007	3.31294	0.00142173	0.0191938	-1.29145
UBR2	-0.296278	6.14335	-3.31291	0.00142186	0.0191938	-1.29153
LINC00276	-0.0937236	3.41537	-3.31287	0.00142204	0.0191938	-1.29165
MDH1	-0.247385	5.53122	-3.31171	0.00142719	0.019253	-1.29492
IGLON5	0.123985	4.34054	3.31139	0.00142857	0.019257	-1.29579
MRRF	-0.260178	5.07043	-3.31129	0.00142902	0.019257	-1.29608
LRRC8C	0.224143	4.26853	3.31028	0.00143356	0.0193078	-1.29895
MPHOSPH6	0.301988	5.6697	3.30963	0.00143646	0.0193364	-1.30077
CBX6	0.20142	4.96577	3.30934	0.00143772	0.0193372	-1.30157
PRICKLE2-AS1	0.169718	3.14561	3.30927	0.00143805	0.0193372	-1.30177
PLA2G16	0.593641	6.17749	3.30889	0.00143975	0.0193497	-1.30284
STMN1	0.19213	5.50518	3.30725	0.00144711	0.0194383	-1.30746
GTF2IRD2B	-0.234786	6.08796	-3.30691	0.00144866	0.0194487	-1.30842
CHST9-AS1	-0.346102	4.14999	-3.30657	0.00145019	0.0194589	-1.30938
TMC6	0.150898	5.25443	3.30613	0.00145217	0.0194751	-1.31062
PLGLB1	-0.825871	5.1195	-3.30551	0.00145497	0.0195022	-1.31236
PDCD1LG2	0.539795	3.80964	3.30516	0.00145658	0.0195133	-1.31335
PTGER2	0.2041	4.59861	3.30382	0.00146265	0.0195843	-1.31712
BCAP31	0.193188	6.20569	3.30317	0.00146563	0.0196137	-1.31896
CYFIP1	0.196469	6.58327	3.3028	0.0014673	0.019618	-1.31998
IGSF21	0.131583	4.1059	3.30275	0.00146751	0.019618	-1.32012
ASH1L-IT1	-0.345427	4.82124	-3.30231	0.00146955	0.0196348	-1.32137
FUT8	0.520167	4.73194	3.3015	0.00147326	0.0196739	-1.32365
GABPB2	-0.320407	5.08743	-3.30116	0.00147482	0.0196843	-1.32461
MAST4-AS1	-0.450017	3.58318	-3.30057	0.00147749	0.0197096	-1.32625
LOC100129216	-0.501786	3.62842	-3.29847	0.00148719	0.019825	-1.33216
HSD17B12	0.255768	5.53007	3.29835	0.00148772	0.019825	-1.33249
SPDEF	0.219149	4.76767	3.29736	0.00149234	0.0198656	-1.33529
CG030	-0.490446	5.03709	-3.29713	0.0014934	0.0198656	-1.33593
LUM	0.687386	6.64599	3.29703	0.00149387	0.0198656	-1.33621
VPS45	-0.27567	5.54934	-3.29698	0.0014941	0.0198656	-1.33635
PPP2R4	0.0959136	5.02605	3.29684	0.00149472	0.0198656	-1.33673
SLFNL1-AS1	-0.273754	4.46809	-3.29652	0.0014962	0.0198748	-1.33762
WASH4P	-0.13771	6.06934	-3.29528	0.00150199	0.0199413	-1.34112
RNF216-IT1	-0.161432	4.44242	-3.29469	0.00150472	0.019967	-1.34276
PTGIS	0.474896	5.74084	3.29451	0.00150561	0.0199681	-1.34329
LGALS3BP	0.264234	6.3029	3.29376	0.00150908	0.0199944	-1.34537
AKR1C3	-0.520406	6.16526	-3.29374	0.00150917	0.0199944	-1.34543
SFRP2	1.01662	4.20651	3.29193	0.00151771	0.0200969	-1.35053
SERPINB10	0.184939	2.47394	3.29089	0.00152259	0.0201509	-1.35343
SART1	0.119772	5.21824	3.29049	0.00152448	0.0201653	-1.35455
SOX30	0.0894918	2.81445	3.28829	0.00153493	0.0202929	-1.36073
CPA4	0.260156	3.5332	3.28765	0.00153798	0.0203225	-1.36252
TINAGL1	0.252808	4.95662	3.28742	0.00153905	0.020326	-1.36315
CBLN2	0.283322	4.4439	3.2869	0.00154154	0.0203482	-1.36461
C9orf47	0.15116	4.62635	3.28648	0.00154356	0.0203536	-1.36579
MIR154	0.0793764	1.9879	3.28648	0.00154357	0.0203536	-1.3658
RNU4-9P	-0.33724	3.25201	-3.28536	0.00154892	0.0204034	-1.36893
ITIH1	-0.810473	5.30032	-3.28535	0.00154897	0.0204034	-1.36895
ABLIM1	-0.381624	6.25563	-3.28478	0.00155172	0.020429	-1.37056
MTG1	-0.160628	5.38062	-3.28444	0.00155337	0.0204317	-1.37152
NCOA2	-0.277878	6.63461	-3.2844	0.00155355	0.0204317	-1.37162
PLEKHO1	0.208241	4.93709	3.28406	0.00155517	0.0204327	-1.37257
FLJ42393	-0.366682	4.33387	-3.28405	0.00155525	0.0204327	-1.37261
SMOX	0.231343	5.2803	3.28385	0.00155621	0.0204346	-1.37317
ZNF833P	-0.124423	3.85581	-3.28317	0.00155948	0.0204571	-1.37507
SLC22A9	-0.374266	3.7575	-3.28315	0.00155955	0.0204571	-1.37511
ELL	0.128214	4.88384	3.2823	0.0015637	0.0205009	-1.37751
HS3ST2	0.268959	4.44947	3.28063	0.00157179	0.020593	-1.38217
GUSBP4	-0.226786	5.89194	-3.28051	0.00157236	0.020593	-1.3825
RMND5B	-0.128753	5.92125	-3.28032	0.00157332	0.0205948	-1.38305
CNTN4	0.251658	3.63077	3.27969	0.0015764	0.0206078	-1.38482
FAM89B	0.267981	5.32408	3.27968	0.00157643	0.0206078	-1.38484
CNKSR3	-0.461665	5.1941	-3.27961	0.00157677	0.0206078	-1.38503
EEF2	0.276716	9.69191	3.27905	0.00157951	0.0206328	-1.3866
CD82	0.254619	5.5555	3.27866	0.00158142	0.020647	-1.38769
NGRN	0.255459	7.0783	3.27813	0.00158401	0.0206667	-1.38917
KHSRP	0.132803	5.5823	3.27787	0.00158529	0.0206667	-1.3899
AMPD2	0.161193	5.36521	3.27769	0.00158616	0.0206667	-1.39039
RAC3	0.157508	4.85907	3.27767	0.00158624	0.0206667	-1.39044
CLYBL-AS2	-0.27139	3.10739	-3.27751	0.00158703	0.0206667	-1.39089
ZNF638-IT1	-0.317838	6.04826	-3.27646	0.00159223	0.0207036	-1.39385
TTLL12	0.219115	5.75271	3.27645	0.00159224	0.0207036	-1.39385
GAS5-AS1	-0.300078	3.29968	-3.27644	0.00159233	0.0207036	-1.3939
RNU7-75P	-0.412766	4.77062	-3.2758	0.00159549	0.0207339	-1.39569
MOB3A	0.210057	6.42352	3.27466	0.00160108	0.0207959	-1.39885
CANT1	0.188826	5.54905	3.27412	0.00160379	0.0208202	-1.40038
PROX1	-0.78002	6.63795	-3.27394	0.00160467	0.0208209	-1.40087
ARNTL2	0.537236	5.55044	3.27377	0.00160552	0.0208213	-1.40136
CRYBA2	0.109348	4.2744	3.27348	0.00160698	0.0208295	-1.40218
PLD3	0.173847	5.84839	3.27244	0.00161215	0.0208857	-1.40507
MUC5B	0.664521	6.0003	3.27189	0.00161487	0.0209005	-1.4066
RN5S88	-0.293096	2.84411	-3.27166	0.00161601	0.0209005	-1.40724
EPSTI1	0.60041	5.23688	3.2716	0.00161634	0.0209005	-1.40742
SIAH1	-0.108943	4.80641	-3.27146	0.00161703	0.0209005	-1.40781
ARHGEF17	0.214141	5.09468	3.27133	0.0016177	0.0209005	-1.40818
PRKAB2	-0.53385	6.00865	-3.27109	0.0016189	0.0209005	-1.40885
RBM39	-0.194567	7.56026	-3.27103	0.00161919	0.0209005	-1.40901
KIAA0196-AS1	-0.203027	5.16337	-3.27088	0.00161994	0.0209005	-1.40943
SNORD98	-0.188148	7.19598	-3.26972	0.00162577	0.020965	-1.41267
ECI2	-0.280514	5.50351	-3.26889	0.00162994	0.0210081	-1.41499
FCGR1C	0.547752	4.14864	3.26862	0.00163127	0.0210144	-1.41573
ABCA3	0.199112	4.73401	3.26814	0.00163371	0.0210351	-1.41708
FAM228A	0.077478	2.92994	3.26727	0.00163812	0.0210811	-1.41951
MTHFD2	0.462424	4.86389	3.2659	0.00164502	0.0211591	-1.42331
C4orf3	0.221555	5.38338	3.26481	0.00165058	0.0212196	-1.42635
TMEM8A	0.186422	6.67874	3.26427	0.00165332	0.0212411	-1.42786
MASP1	-0.452112	4.42858	-3.26415	0.00165394	0.0212411	-1.42819
SPDYE7P	-0.271578	4.33022	-3.26385	0.00165548	0.0212501	-1.42903
SPTLC2	0.29218	6.12085	3.2636	0.00165678	0.0212559	-1.42974
SERPIND1	-0.859942	4.96591	-3.26287	0.0016605	0.0212928	-1.43176
CACNB1	0.130957	4.52618	3.26207	0.00166461	0.0213347	-1.434
MCAM	0.363794	5.67441	3.26163	0.00166685	0.0213436	-1.43521
CHRNA5	0.356747	3.25977	3.26155	0.00166729	0.0213436	-1.43545
LRRC4B	0.103897	3.65905	3.26144	0.00166785	0.0213436	-1.43575
CYP26B1	0.155862	4.73266	3.26119	0.00166911	0.0213488	-1.43644
LINC00272	-0.105419	3.39102	-3.2597	0.00167683	0.0214367	-1.4406
SPRYD3	0.165998	5.46481	3.25885	0.00168125	0.0214822	-1.44298
RAB32	0.344908	6.02215	3.25845	0.00168332	0.0214978	-1.44409
2024-03-01	-0.24145	3.97702	-3.25693	0.00169123	0.0215801	-1.44832
TUBA4A	0.335526	6.81329	3.25688	0.00169148	0.0215801	-1.44845
SNORD63	-0.540977	6.23274	-3.25634	0.00169428	0.0215954	-1.44995
LYPD3	0.216709	4.33031	3.25632	0.00169439	0.0215954	-1.45001
SCLY	-0.196005	4.70613	-3.25613	0.00169537	0.0215969	-1.45053
CPN1	-0.432555	4.1149	-3.25581	0.00169705	0.0216062	-1.45142
CRYBG3	0.323128	4.32025	3.25566	0.00169782	0.0216062	-1.45183
SLC25A30	-0.577287	6.22692	-3.25532	0.0016996	0.0216179	-1.45278
CCL16	-0.651165	5.13794	-3.25503	0.00170115	0.0216267	-1.4536
TRMT1L	-0.231716	4.81265	-3.25476	0.00170254	0.0216334	-1.45434
KIAA1328	-0.201185	4.14273	-3.25449	0.00170397	0.0216407	-1.4551
SGK223	0.252265	5.43409	3.25391	0.00170703	0.0216596	-1.45672
FCGR2B	0.473767	4.62247	3.25384	0.00170738	0.0216596	-1.4569
LOC100507568	0.146538	3.03336	3.25371	0.00170807	0.0216596	-1.45727
PROX1-AS1	-0.542573	3.68795	-3.25355	0.0017089	0.0216596	-1.45771
WNT10A	0.203472	4.47694	3.25285	0.00171262	0.0216958	-1.45967
IFNGR2	0.256365	6.34668	3.25156	0.00171943	0.0217607	-1.46325
CLSPN	0.338762	3.30265	3.25155	0.00171948	0.0217607	-1.46328
KLK10	0.563107	4.99529	3.25104	0.00172219	0.0217841	-1.4647
KRTAP13-2	0.0872793	2.10578	3.24991	0.0017282	0.0218492	-1.46784
NCF2	0.443624	4.69963	3.24954	0.00173012	0.02186	-1.46885
MRVI1-AS1	0.133194	3.12982	3.24942	0.0017308	0.02186	-1.4692
XIAP-AS1	-0.203943	7.32913	-3.24854	0.0017355	0.0219084	-1.47165
GCKR	-0.612162	4.8308	-3.24835	0.00173649	0.0219099	-1.47216
COA5	-0.178522	6.14763	-3.24791	0.00173887	0.021929	-1.4734
TMCO3	0.250406	5.75602	3.24739	0.00174163	0.0219519	-1.47483
LAT2	0.248386	4.83054	3.2472	0.00174266	0.0219519	-1.47536
LOC100505605	-0.191904	5.9077	-3.24698	0.00174382	0.0219519	-1.47596
LOC100509474	-0.570606	3.8425	-3.24675	0.00174504	0.0219519	-1.4766
CGB2	0.235853	4.25434	3.24675	0.00174505	0.0219519	-1.4766
DYNLT3	0.292369	5.80371	3.24658	0.00174597	0.0219525	-1.47708
PMS2P5	-0.318405	7.10372	-3.2455	0.00175177	0.0220143	-1.48007
OR51E1	0.191134	2.95664	3.24367	0.00176166	0.0221191	-1.48515
TSHR	-0.166662	2.92427	-3.24364	0.00176186	0.0221191	-1.48525
FAM185A	-0.258167	5.04522	-3.24329	0.00176375	0.0221318	-1.48622
ZNF385A	0.180772	5.11168	3.24291	0.00176578	0.0221461	-1.48725
UBE2L6	0.295609	7.32683	3.24265	0.00176723	0.0221533	-1.48799
RNPEPL1	0.152483	5.78694	3.24154	0.00177323	0.0222174	-1.49105
SEMA3F	0.141308	4.71292	3.24111	0.0017756	0.0222361	-1.49226
LOC149351	-0.223138	5.14876	-3.23998	0.00178176	0.0222953	-1.49538
PSMC3	0.200909	6.61106	3.23989	0.00178226	0.0222953	-1.49564
ST6GALNAC5	0.311081	4.23643	3.23966	0.00178352	0.0222953	-1.49628
C14orf178	-0.15542	3.23706	-3.2396	0.00178387	0.0222953	-1.49645
CBWD7	-0.280659	5.92063	-3.23926	0.00178571	0.0223072	-1.49738
GMCL1	-0.416121	5.77178	-3.23842	0.00179035	0.022354	-1.49972
LOC100131679	-0.259162	3.42665	-3.23716	0.00179728	0.0224294	-1.50321
ISLR2	0.133773	3.84775	3.23694	0.00179848	0.0224311	-1.50381
DNAJB5	0.156111	4.57806	3.23678	0.0017994	0.0224311	-1.50427
MRPS28	-0.225867	6.128	-3.23665	0.00180009	0.0224311	-1.50462
PAFAH1B2	0.152858	5.8779	3.23605	0.00180339	0.0224515	-1.50627
SAPCD1	-0.25416	5.11849	-3.23596	0.00180391	0.0224515	-1.50653
KIAA0141	-0.195216	5.18845	-3.23587	0.0018044	0.0224515	-1.50678
DYRK4	0.127391	4.03476	3.23531	0.0018075	0.0224697	-1.50832
CTPS1	-0.37922	5.26886	-3.23517	0.00180827	0.0224697	-1.50871
C17orf108	-0.16249	4.34434	-3.23512	0.00180855	0.0224697	-1.50885
DNAH14	-0.516957	3.70179	-3.23494	0.00180958	0.0224715	-1.50936
[truncated: 23,131 more rows]
